1 Assembly of hundreds of novel bacterial genomes from the chicken caecum

2 Authors: Laura Glendinning<sup>1</sup>, Robert D. Stewart<sup>1</sup>, Mark J. Pallen<sup>2,3,4</sup>, Kellie A. Watson<sup>1</sup>, Mick Watson<sup>1</sup>

3 <sup>1</sup>Genetics and Genomics, The Roslin Institute and Royal (Dick) School of Veterinary Studies, University of  
4 Edinburgh, Edinburgh, Midlothian, United Kingdom

5 <sup>2</sup>Microbes in the Food Chain, Quadram Institute Bioscience, Norwich, UK

6 <sup>3</sup>School of Biological Sciences, University of East Anglia, Norwich, Norfolk, UK

7 <sup>4</sup>School of Veterinary Medicine, University of Surrey, Guildford, Surrey, UK

8

9 **Abstract:**

10 Chickens are a highly important source of protein for a large proportion of the human population. The cecal  
11 microbiota plays a crucial role in chicken nutrition through the production of short chain fatty acids, nitrogen  
12 recycling and amino acid production. In this study we sequenced DNA from cecal contents samples taken  
13 from 24 chickens belonging to either a fast or slower growing breed consuming either a vegetable-only diet  
14 or a diet containing fish meal. We utilised 1.6T of Illumina data to construct 469 draft metagenome-  
15 assembled bacterial genomes, including 460 novel strains, 283 novel species and 42 novel genera. We also  
16 compared the abundance of these genomes, and the carbohydrate active enzymes they produce, between  
17 our chicken groups and demonstrate that there are both breed- and diet- specific microbiomes, as well as an  
18 overlapping core microbiome. This data will form the basis for future studies examining the composition and  
19 function of the chicken cecal microbiota.

20

21 **Background:**

22 There are an estimated 23 billion live chickens on the planet at any one time (1), out-numbering humans by  
23 over 3:1. As most of these are reared for food, the actual number of chickens produced per year is even  
24 higher, at almost 65 billion, leading some to speculate that the accumulation of chicken bones in the fossil  
25 record will be used by future archaeologists as a unique marker for the Anthropocene (2).

26 Since the 1960s, worldwide chicken meat production has increased by over ten times (3). Global meat  
27 production is predicted to be 16% higher in 2025 vs. 2015, with most of this increase originating from poultry  
28 meat production (4). Part of the popularity of chicken meat is that, due to intensive selection, chickens have  
29 been developed which are highly productive in terms of their growth rate with efficient feed conversion  
30 ratios (the rate at which chickens convert feed into muscle), decreasing from 3.0 in the 1960s to 1.7 in 2005  
31 (5), making them a cheap source of protein in comparison to other livestock. Chickens also produce less

32 greenhouse gasses per kg of meat than pigs, cattle and sheep (6). The potential to manipulate the microbiota  
33 in chickens to gain further increases in productivity is of great commercial and scientific interest, leading to  
34 the use of probiotics across the poultry industry (7).

35 As well as playing an important role in pathogen protection (8) and immune system development (9), the  
36 microbiota of the chicken also plays a crucial nutritional role. The largest concentration of microbial cells in  
37 the chicken gastrointestinal tract can be found in the ceca and thereby the majority of chicken microbiota  
38 studies focus primarily on these microbial communities. Members of the cecal microbiota are able to produce  
39 short chain fatty acids (SCFAs) such as acetate, butyrate, lactate and propionate from carbohydrate sources  
40 which have passed through the small intestine; these SCFAs are then able to be absorbed by the bird and  
41 used as an energy source (10). Members of the chicken cecal microbiota have also been implicated in the  
42 recycling of nitrogen by the degradation of nitrogenous compounds (11) and the synthesis of amino acids  
43 (12). One study demonstrated that 21% of the variation in chicken abdominal fat mass could be attributed  
44 to the cecal microbiota composition, when controlling for host genetic effects (13). Differences have also  
45 been observed between birds with high and low feed efficiency (14, 15). However, despite extensive research  
46 over many decades, the quantitative importance of the ceca in chicken nutrition remains unclear (16), and  
47 relatively few microbes commensal in the chicken gut have been sequenced and deposited in public  
48 repositories.

49 The emergence of cheaper DNA sequencing technologies (17, 18) has led to an explosion in studies which  
50 have sought to characterise the chicken gastrointestinal microbiota, particularly using 16S rRNA gene based  
51 methods. Whilst valuable, marker-gene studies do not enable an in-depth functional and genomic  
52 characterisation of the microbiome. Some microbes from the chicken ceca have been successfully cultured  
53 and sequenced, including 133 gut anaerobes with a wide range of metabolic potentials (19); however it is  
54 highly unlikely that these microbes represent the entire diversity of the chicken cecal microbiota, due to the  
55 difficulty in culturing many anaerobic gut microorganisms. One method which avoids this issue of culturability  
56 is the construction of metagenome assembled genomes (MAGs). Due to improvements in computational  
57 power and sequencing technologies, and the development of new computational approaches (20, 21), it is  
58 now possible to accurately bin short-read metagenomic data into high-quality genomes. Using this technique  
59 thousands of MAGs have been generated from various environments, including humans (22, 23), the rumen  
60 (24, 25), pig faeces (26), marine surface waters (27, 28), an underground aquifer system (29) and other public  
61 datasets (30).

62 In this study we sought to use metagenomic sequencing, assembly and binning to investigate the chicken  
63 cecal microbiota. In order to maximise diversity, we chose two commercial bird genotypes with different  
64 growth phenotypes, fed two different diets. This also allows us to look at the effects of breed and diet on  
65 strain level microbial abundance. The lines chosen for the study are Ross 308, a fast growing broiler breed,  
66 and the Ranger Classic, a slower growing broiler aimed at free-range, organic farms. All birds were fed either

67 a vegetable-only diet or a diet based on fish meal as the protein source. The inclusion of fish meal in chicken  
68 diets has previously been linked to changes in the cecal microbiota and is correlated with an increased risk  
69 of necrotic enteritis (31, 32). We assemble 460 novel microbial strains, predicted to represent 283 novel  
70 microbial species and 42 novel microbial genera from the chicken microbiome, and go on to demonstrate  
71 both a breed- and diet- specific microbiota. Whilst we show that large numbers of strains are shared between  
72 birds, it is their relative abundance that largely drives breed and diet effects. This is the first large-scale  
73 binning of the chicken cecal microbiota, and we believe these data will form the basis for future studies of  
74 the structure and function of the chicken gut microbiome.

75

## 76 **Methods:**

### 77 **Ethical statement**

78 Animals were housed in premises licensed under a UK Home Office Establishment License within the terms  
79 of the UK Home Office Animals (Scientific Procedures) Act 1986. Housing and husbandry complied with the  
80 Code of Practice for Housing and Care of Animals Bred, Supplied or Used for Scientific Purposes and were  
81 overseen by the Roslin Institute Animal Welfare and Ethical Review Board. Animals were culled by schedule  
82 one methods authorized by the Animals (Scientific Procedures) Act 1986.

83

### 84 **Study design**

85 Ross 308 (Aviagen, UK) (n=12) and Ranger Classic (Aviagen, UK) (n=12) chickens were hatched and housed at  
86 the National Avian Research Facility in Edinburgh (UK). Birds were fed either a vegetable only diet or a diet  
87 supplemented with fish meal (**Table 1, Supplementary table 1**) (Diet formulation: **Supplementary tables 2**  
88 **and 3**, nutritional info: **Supplementary table 4**). Birds received Mareks-Rispins vaccinations (Merial, France)  
89 at 1-2 days of age and were housed by group in separate floor pens (within the same room) with wood  
90 shaving bedding, and receiving food and water ad libitum. Stocking densities were based on UK Home Office  
91 Animals (Scientific Procedures) Act 1986, resulting in a floor area per bird of 0.133 m<sup>2</sup> at 5 weeks of age. Birds  
92 were euthanized by cervical dislocation at 5 weeks of age and cecal content samples were collected. Contents  
93 from both ceca were pooled to make one sample per bird. Samples were stored at 4°C for a maximum of 24  
94 hours until DNA extraction, except for those from DNA extraction batch 2 which were frozen at -20°C for 9  
95 days prior to DNA extraction (**Supplementary table 5**). DNA extraction was performed as described  
96 previously using the DNeasy PowerLyzer PowerSoil Kit (Qiagen, UK) (33). Shotgun sequencing was performed  
97 on a NovaSeq (Illumina) producing 150bp paired-end reads.

98 **Table 1: Chicken details**

| Line           | Diet           | N                    | Mean body weight (kg)      |
|----------------|----------------|----------------------|----------------------------|
| Ranger Classic | Fish meal diet | 6 (3 male, 3 female) | Female: 1.89<br>Male: 2.13 |
|                | Vegetable diet | 6 (3 male, 3 female) | Female: 1.57<br>Male: 1.94 |
| Ross 308       | Fish meal diet | 6 (3 male, 3 female) | Female: 2.33<br>Male: 2.70 |
|                | Vegetable diet | 6 (4 male, 2 female) | Female: 2.23<br>Male: 2.89 |

99

100 **Bioinformatics**

101 Assembly and binning was carried out as previously described (24, 25). Illumina adaptors were removed using  
102 trimmomatic (34). Single sample assemblies were performed using IDBA-UD (35) with the options --  
103 num\_threads 16 --pre\_correction --min\_contig 300. BWA MEM (36) was used to separately map reads from  
104 every sample back to every assembly. SAMtools (37) was used to create BAM files and the command  
105 jgi\_summarize\_bam\_contig\_depths was run on all BAM files for each assembly to calculate coverage. A  
106 coassembly was also carried out on all 24 samples using MEGAHIT (options: --continue --kmin-1pass -m  
107 100e+10 --k-list 27,37,47,57,67,77,87 --min-contig-len 1000 -t 16) (38). Contigs were filtered to a minimum  
108 length of 2kb, then indexed and mapped as for single assemblies.

109 METABAT2 (21) was used on both single-sample assemblies and co-assemblies to carry out metagenomic  
110 binning, taking into account coverage values and with the options --minContigLength 2000, --  
111 minContigDepth 2. All bins were dereplicated using dRep (39) with the options dereplicate\_wf -p 16 -comp  
112 80 -con 10 -str 100 -strW. Bins were dereplicated at 99% average nucleotide identity (ANI), resulting in each  
113 MAG being taxonomically equivalent to a microbial strain. Bins were also dereplicated at 95% ANI to calculate  
114 the number of species represented within our MAGs. CompareM was used to calculate average amino acid  
115 identity (AAI) (40).

116 The completeness and contamination of all bins was assessed using CheckM (41) with the options lineage\_wf,  
117 -t 16, -x fa and filtering for completeness  $\geq 80\%$  and contamination  $\leq 10\%$ . GTDB-Tk (42) was used to assign  
118 taxonomy to MAGs, except for CMAG\_333 which upon visual inspection of taxonomic trees was identified  
119 more accurately as *Clostridia*. For submission of our MAGs to NCBI, MAGs were named based on the following  
120 rule: if the lowest taxonomy assigned by GTDB-Tk did not correlate with an NCBI classification at the correct  
121 taxonomic level then MAGs were named after the lowest taxonomic level at which NCBI and GTDB-Tk

122 matched. Comparative genomics between the MAGS and public datasets was carried out using MAGpy (43).  
123 The taxonomic tree produced by MAGpy was re-rooted manually using Figtree (44) at the branch between  
124 Firmicutes and the other bacterial phyla, and subsequently visualised using Graphlan (45). The novelty of  
125 genomes in comparison to those present in public databases was also determined. Genomes were defined  
126 as novel strains if the ANI output by GTDB-Tk was <99%. Genomes were determined as novel species if the  
127 ANI output by GTDB-Tk was <95% or if an ANI was not output by GTDB-Tk then the average protein similarity  
128 output by MAGpy was <95%. Genera were defined as novel if all MAGs which clustered at 60% AAI (46) were  
129 not assigned a genus by GTDB-Tk. Proposed names for new genera and species belonging to these genera  
130 were formulated based on the International Code of Nomenclature of Prokaryotes (47).

131 Carbohydrate active enzymes (CAZymes) were identified by comparing MAG proteins to the CAZy database  
132 (48) using dbcan2 (version 7, 24<sup>th</sup> August 2018). The abundance of CAZyme groups was then calculated as  
133 the sum of reads mapping to MAG proteins within each group after using DIAMOND (49) to align reads to  
134 the MAG proteins.

135

#### 136 **Statistics and graphs**

137 Univariate general linear models (GLMs) were performed in SPSS Statistics 21 (IBM) with gender, line and  
138 diet as fixed factors. All other statistical analyses were carried out in R (50) (version 3.5.1.). NMDS graphs  
139 were constructed using the Vegan package (51) and ggplot2 (52), using the Bray–Curtis dissimilarity. Boxplots  
140 were constructed using the ggplot2 package. UpSet graphs were constructed using the UpSetR package (53).  
141 Correlation coefficients, using R's hclust function, were used to cluster samples and MAGs within heatmaps.  
142 PERMANOVA analyses were performed using the Adonis function from the Vegan package. The package  
143 DESeq2 (54) was used to calculate differences in abundance for individual MAGs, taxonomies and CAZymes.  
144 For MAGs, subsampling to the lowest sample coverage was performed prior to analysis by PERMANOVA and  
145 NMDS and before calculating the 1X and 10X coverage of MAGs in samples.

146

#### 147 **Data availability**

148 Paired-read fastq files have been submitted to the European Nucleotide Archive under project PRJEB33338.  
149 MAG fasta files have been submitted to Edinburgh DataShare (<https://doi.org/10.7488/ds/2584>).

150

## 151 **Results**

### 152 **Assembly of 469 draft microbial genomes from chicken ceca**

153 We produced 1.6T of Illumina data from 24 chicken samples, carried out a metagenomic assembly of single  
154 samples and also a co-assembly of all samples. 4524 metagenomic bins were created from the single-sample  
155 binning and 576 more were created from co-assembly binning. We were left with a total of 469 dereplicated  
156 genomes (99% ANI) with estimated completeness of  $\geq 80\%$  and estimated contamination  $\leq 10\%$   
157 (**Supplementary figure 1**), 377 of which originated from the single-sample binning and 92 from the co-  
158 assembly. Of these, 349 had completeness  $>90\%$  and contamination  $<5\%$  (high-quality draft genomes as  
159 defined by Bower *et al.* (55)), 210 were  $>95\%$  complete with  $<5\%$  contamination and 47 MAGs were  $>97\%$   
160 complete with 0% contamination. The distribution of these MAGs (based on coverage) between the 24  
161 samples can be found in **Dataset 1**. After dereplication to 95% ANI, 335 MAGs remained, representing  
162 putative novel species identified in our samples. Our dataset therefore contains 469 microbial strains from  
163 335 species. 283 of these species and 460 of these strains were novel when compared to public databases  
164 (**Dataset 2**).

165 **Dataset 2** contains the NCBI taxonomic assignment for each MAG along with the assembly characteristics  
166 and GTDB-Tk taxonomic assignments. **Dataset 3** contains comparative genomics information produced by  
167 MAGpy. **Figure 1** shows a phylogenetic tree of the MAGs. This was used to manually correct any errors in  
168 taxonomic identification. The tree is dominated by *Oscillospirales* (179) and *Lachnospirales* (134), with  
169 smaller numbers of genomes representing other bacterial orders, including *4C28d-15* (42), *Lactobacillales*  
170 (21), *RF39* (20), *Christensenellales* (17), *TANB77* (10), *Peptostreptococcales* (9), *Erysipelotrichales* (8), etc. 97  
171 MAGS were identified to species, 246 identified to genus, 115 identified to family, 10 identified to order and  
172 1 identified to class. No MAGs were identified as Archaea.



173 **Figure 1:**

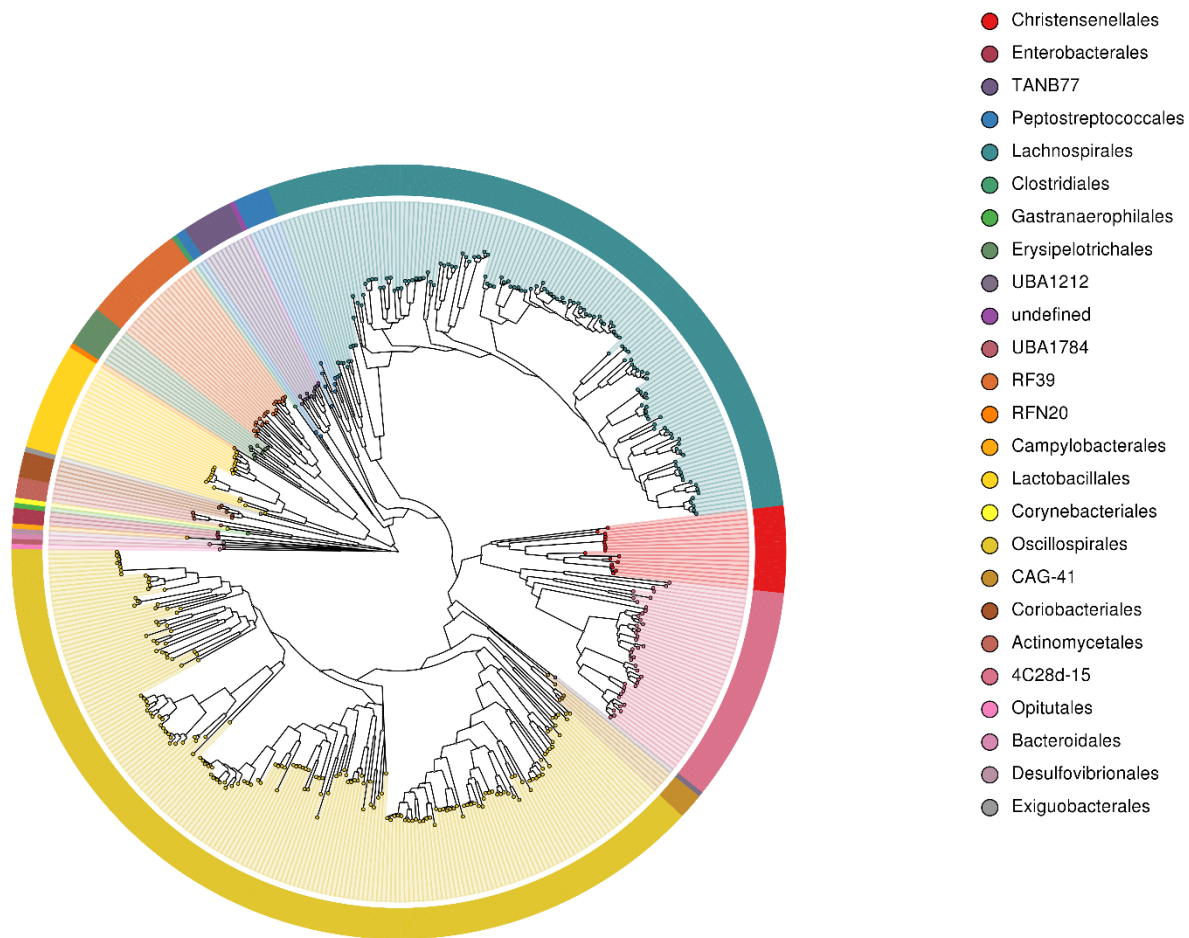

174

175 **Phylogenetic tree of the 469 draft microbial genomes from the chicken ceca, labelled by taxonomic order,**  
176 **as defined by GTDB-Tk. Draft genomes labelled as “undefined” were only able to be assigned taxonomy at**  
177 **a higher level than order.**

178

179 Of the MAGs that show greater than 95% ANI with an existing sequenced genome, several of these genomes  
180 have previously been identified in chickens. Our MAGs include 6 novel strains of *Anaeromassilibacillus* sp.  
181 *An250* (19), a novel strain of *Anaerotignum lactatifermentans* (56), a novel strain of *Blautia* sp. *An81* (19), 3  
182 novel strains of *Drancourtella* sp. *An57* (19), a novel strain of *Enterococcus cecorum* (57), 2 novel strains of  
183 *Escherichia coli* (14, 58, 59), 3 novel strains of *Eubacteriaceae bacterium CHKCI004* (60), a novel strain of  
184 *Eubacterium* sp. *An11* (19), two novel strains of *Faecalibacterium* spp. (19, 30), 7 novel strains of *Flavonifactor*  
185 spp. (19), 3 novel strains of *Gordonibacter* spp. (19), 1 novel strain of *Helicobacter pullorum* (61), 15 novel  
186 strains of *Lachnoclostridium* spp. (19), 6 novel strains of *Lachnospiraceae bacterium UBA1818* (30), 2 novel  
187 strains of *Massiliomicrobiota* sp. *An134* (19) and 5 novel strains of *Pseudoflavonifractor* sp. *An184* (19).

188 We also identified several Lactobacilli which have previously been isolated from the chicken gastrointestinal  
189 tract and have been suggested as potential probiotics in chickens, including 5 novel strains of *Lactobacillus*

190 *crispatus* (62-64), 2 novel strains of *Lactobacillus gallinarum* (65), a novel strain of *Lactobacillus johnsonii* (66,  
191 67), a novel strain of *Lactobacillus oris* (68), a novel strain of *Lactobacillus reuteri* (59, 62, 69) and a novel  
192 strain of *Lactobacillus salivarius* (59, 67, 70).

193 Our MAGs represent several putative novel species from 7 taxonomic classes: including 25 species of *Bacilli*,  
194 252 species of *Clostridia*, 2 species of *Coriobacteriia*, 1 species of *Desulfovibrionia*, 1 species of *Lentisphaeria*,  
195 1 species of *Vampirovibrionia* and 1 species of *Verrucomicrobiae*. These include 5 novel species of  
196 *Lactobacillus*. Our MAGs also contain 42 putative novel genera which contain 69 of our MAGs. We defined a  
197 genus as novel if all MAGs which clustered at 60% AAI were not assigned a genus by GTDB-Tk (**Dataset 4**).  
198 This is a conservative method of defining genera, as genera within different taxonomies may cluster at higher  
199 AAIs (46, 71, 72). 40 of these novel genera belong to the class *Clostridia*, with over half belonging to the order  
200 *Oscillospirales*. One of the remaining novel genera contains one MAG which belongs to the *Bacilli* class (order  
201 *Exiguobacterales*) while the remaining genus belongs to the *Cyanobacteria*, within the order  
202 *Gastranaerophilales*. GTDB-Tk was unable to assign taxonomy to either of these genera at lower than order  
203 level, indicating that they may belong to novel bacterial families. It should also be noted that several genus-  
204 level MAG clusters do not contain any MAGs which were assigned a valid NCBI genus label but instead only  
205 received names defined by GTDB-Tk. For example, Group 16 (**Dataset 4**) is entirely constituted by MAGs of  
206 the genus UBA7102.

207

#### 208 **Presence of a core chicken cecal microbiota**

209 125 MAGs were found to be present in at least 1X coverage in all samples and 4 of these MAGs were found  
210 to be  $\geq 10$  in all samples: *Alistipes* sp. *CHKCI003* CMAG\_6, uncultured *Bifidobacterium* sp. CMAG\_55,  
211 uncultured *Bifidobacterium* sp. CMAG\_59 and *Firmicutes bacterium* *CAG\_94* CMAG\_438. Only one MAG was  
212 found to be uniquely present in only one sample at  $\geq 1$ X coverage: uncultured *Clostridia* sp. CMAG\_391 in  
213 Chicken 16 (Ross 308: Vegetable diet). The distribution of MAGs between groups can be seen in **Figure 2**. 276  
214 MAGs were on average present at at least 1X coverage in all groups and could therefore be described as a  
215 core microbiota shared amongst the chickens in our study.



216 **Figure 2:**

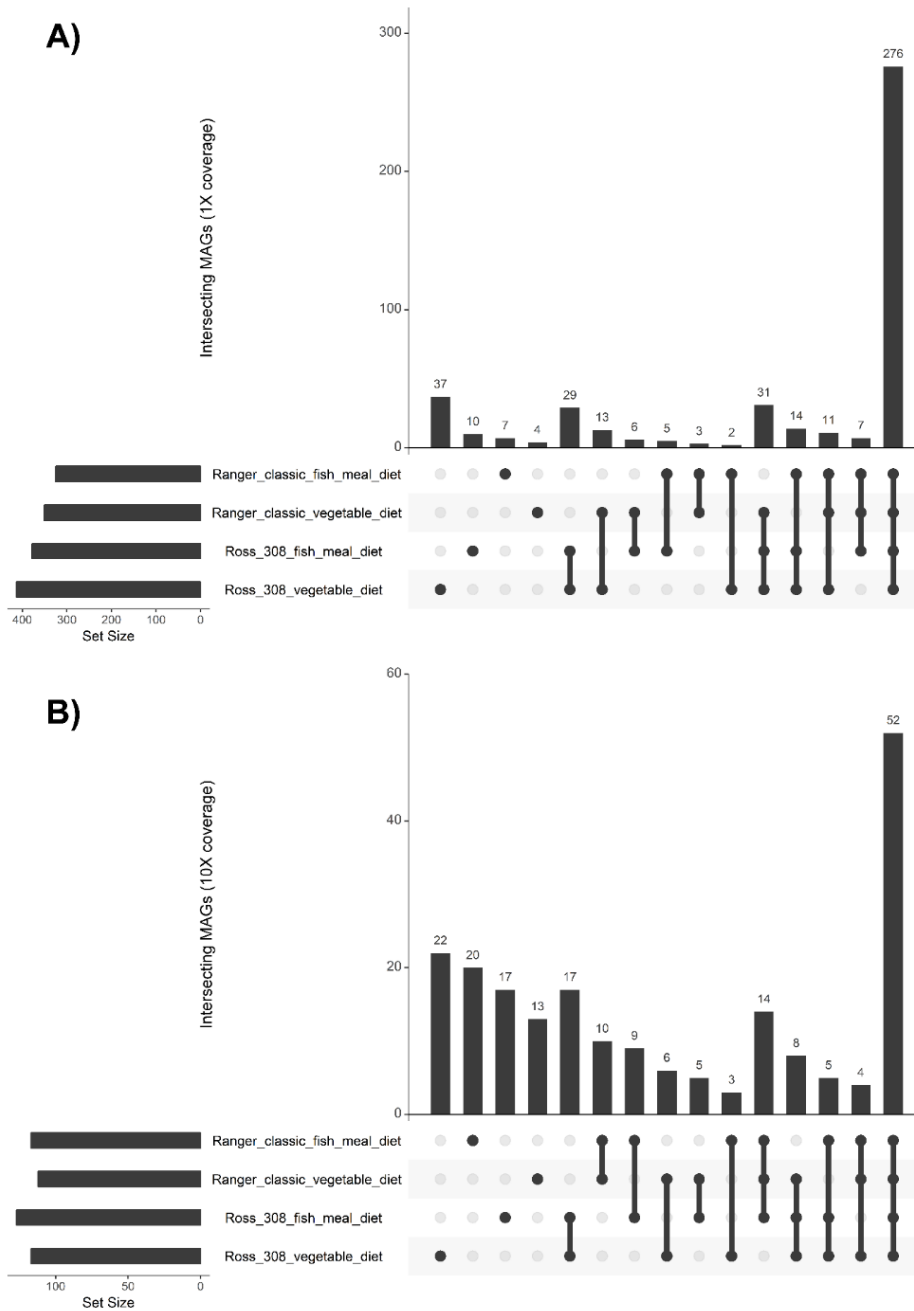

217

218 **UpSet graphs showing the number of shared MAGs at A) average 1X coverage and B) average 10X coverage**  
219 **in the four chicken groups**

220

221 **Differences in cecal MAGs based on chicken line and diet.**

222 When comparing samples based on the coverage of MAGs, significant clustering of samples by group can be  
223 observed when comparing all groups (PERMANOVA:  $P < 0.001$ ); between chicken lines (All samples:  
224 PERMANOVA:  $P < 0.001$ ; Within vegetable diet: PERMANOVA:  $P = 0.015$ , Within fish meal diet PERMANOVA:  
225  $P = 0.0082$ )(**Figure 3**) and between diets (All samples: PERMANOVA:  $P = 0.008$ ; Within Ross 308 line:

226 PERMANOVA:  $P = 0.018$ ; Within Ranger Classic line: PERMANOVA:  $P = 0.0043$ ) (**Figure 3**). A significant  
227 interaction was also observed between line and diet (Line\*Diet PERMANOVA:  $P = 0.038$ ). Gender and DNA  
228 extraction batch were not found to have significantly affected the abundance of MAGs (PERMANOVA:  
229  $P > 0.05$ ).

230

231 **Figure 3:**

232

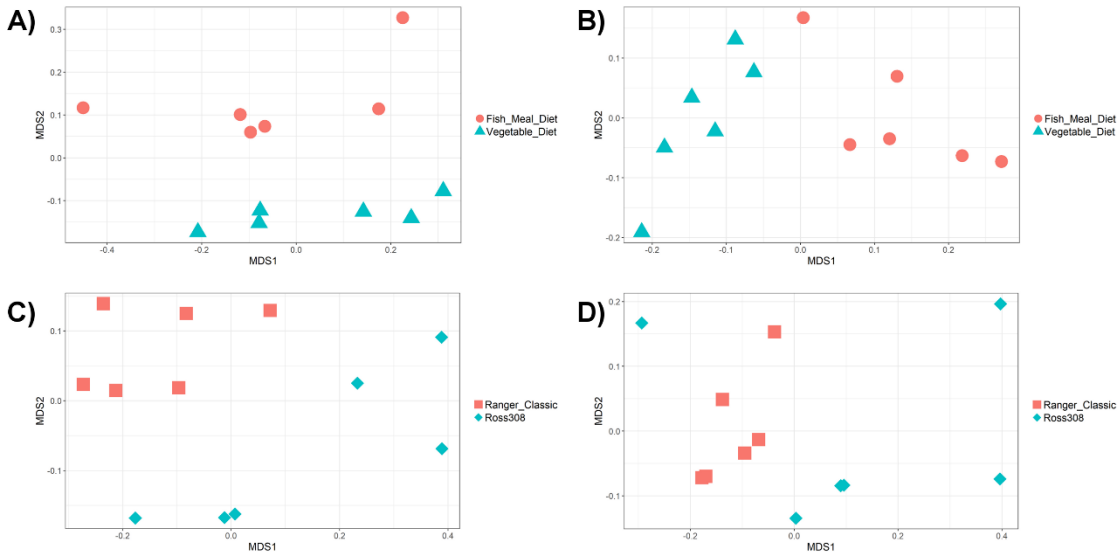

233

234 **NMDS of chicken cecal samples clustered by proportion of MAGs (Bray-Curtis dissimilarity). A) Ross 308**  
235 **birds clustered by diet (PERMANOVA:  $P = 0.018$ ) B) Ranger Classic birds clustered by diet (PERMANOVA:  $P$**   
236 **= 0.0043) C) Birds on a vegetable diet clustered by line (PERMANOVA:  $P = 0.015$ ) D) Birds on a fish meal**  
237 **diet clustered by line (PERMANOVA:  $P = 0.0082$ ).**

238

239 MAGs which were significantly more abundant by coverage between groups were identified by DESeq2  
240 (**Figure 4**); a full list of these MAGs can be found in **Dataset 5**. In Ross 308 birds, 43 MAGs were found to be  
241 differentially abundant between the two diets, while in Ranger Classic birds 45 MAGs were found to be  
242 differentially abundant. Several MAGs were found to be differentially abundant between the two lines when  
243 birds were consuming a vegetable diet (61 MAGs) or a fish meal diet (69 MAGs). 98 MAGs were found to be  
244 differentially abundant between lines when controlling for diet and 64 MAGs were found to be differentially  
245 abundant between diets when controlling for line.

246 **Figure 4:**

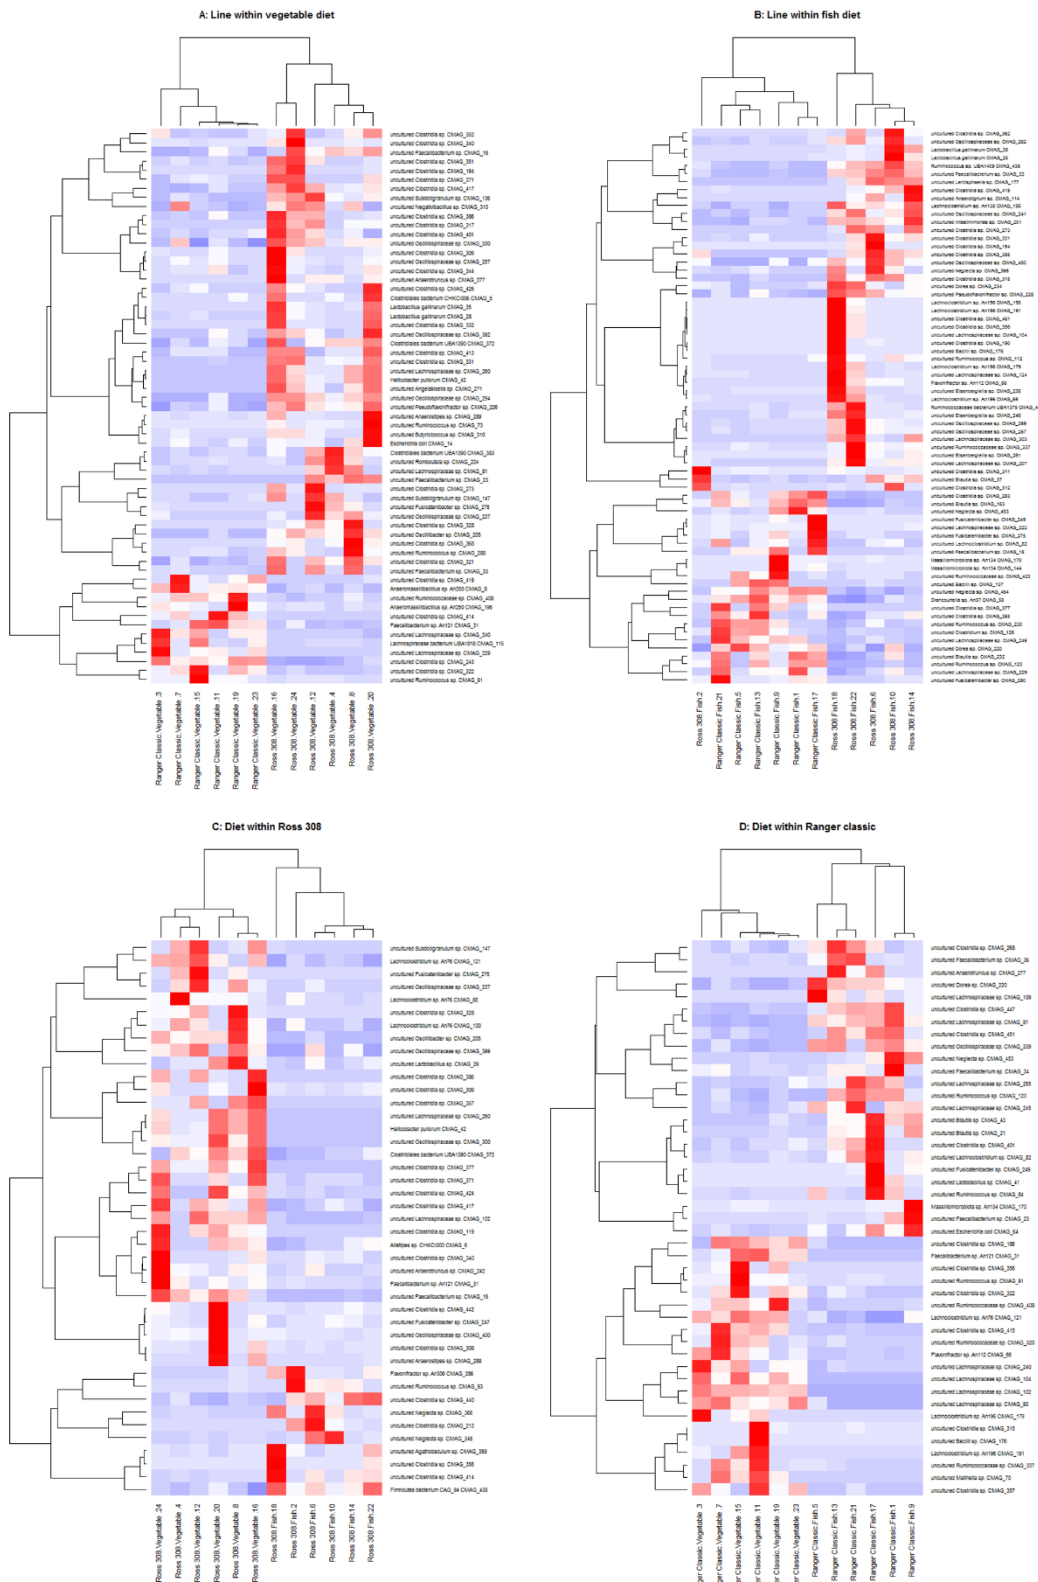

247

248 **Heatmap showing the proportional coverage of MAGs which were significantly differently abundant**

249 **between groups (Deseq2,  $P \leq 0.05$ ). Euclidean clustering was used to cluster MAGs and samples.**

250

251 No MAGs were found to be significantly more abundant in both Ross 308 and Ranger Classic birds fed a fish  
252 meal diet, whilst four MAGs were found to be significantly more abundant in both Ross 308 and Ranger  
253 Classic birds fed a solely vegetable diet: uncultured *Lachnospiraceae* sp. CMAG\_102, *Lachnoclostridium* sp.  
254 *An76* CMAG\_121, *Faecalibacterium* sp. *An121* CMAG\_31 and uncultured *Clostridia* sp. CMAG\_357.

255 Eight MAGs were found to be significantly more abundant in Ross 308 chickens on both diets: uncultured  
256 *Pseudoflavonifractor* sp. CMAG\_226, uncultured *Oscillospiraceae* sp. CMAG\_257, uncultured *Clostridia* sp.  
257 CMAG\_273 and uncultured *Clostridia* sp. CMAG\_331, *Clostridia* sp. CMAG\_194, *Lactobacillus gallinarum*  
258 CMAG\_28, uncultured *Faecalibacterium* sp. CMAG\_33 and *Lactobacillus gallinarum* CMAG\_35. In contrast,  
259 only one MAG was found to be consistently more abundant in Ranger Classic birds on both diets (uncultured  
260 *Lachnospiraceae* sp. CMAG\_229).

261 Lactobacilli are of particular interest to probiotic manufacturers. We found that both MAGs identified as  
262 *L.gallinarum* were more abundant in Ross 308 birds when controlling for diet, and four of the five MAGs  
263 identified as *L.crispatus* were more abundant in birds fed a diet with fish meal when controlling for chicken  
264 line.

265 One notable observation is the high amount of *Helicobacter pullorum* observed in the Ross 308: Vegetable  
266 diet group. While *H. pullorum* is often thought of as a pathogen, it has previously been isolated from the ceca  
267 of asymptomatic chickens (61) and carriage of *Helicobacter* by chickens is common in commercial flocks (73-  
268 75).

269

## 270 **Differences in CAZymes between lines and diets**

271 Carbohydrate-active enzymes (CAZymes) are enzymes involved in the metabolism, synthesis and binding of  
272 carbohydrates. They are grouped by the CAZy database (48) into the following major groups: the auxiliary  
273 activities (AAs) class, carbohydrate-binding modules (CBMs), carbohydrate esterases (CEs), glycoside  
274 hydrolases (GHs), glycosyltransferases (GTs) and polysaccharide lyases (PLs). As their names suggest, CEs are  
275 responsible for the hydrolysis of carbohydrate esters while CBMs are responsible for binding carbohydrates.  
276 GHs and PLs are both responsible for cleaving glycosidic bonds, hydrolytically or non-hydrolytically  
277 respectively, while GTs are able to catalyse the formation of glycosidic bonds. The AA class are not themselves  
278 CAZymes but instead act in conjunction with them as redox enzymes. We compared the predicted proteins  
279 from our MAGs with the CAZy database using dbcan with the cut-offs E-value < 1e-18 and coverage > 0.35.

280 When clustering groups by the abundance of MAG derived CAZymes, all groups separate visually (**Figure 5**)  
281 but only the following differences were significant: Ross 308 birds were shown to cluster significantly by diet  
282 (PERMANOVA, P=0.021), and birds receiving a fish meal diet clustered significantly by line (PERMANOVA,  
283 P=0.0065). A significant interaction was observed between line and diet (Line\*Diet PERMANOVA: P = 0.0051).

284 Using DESeq2 we also found that the abundances of specific CAZymes differed between groups (**Figure 6**),  
285 full lists of which can be found in **Dataset 6**. We found several starch degrading enzymes to be differentially  
286 abundant between lines when controlling for diet, including GH13 subfamily 10, GH15, GH57, GH4 and GH31,  
287 and between diets when controlling for line, including GH13, GH13 subfamily 28 and GH13 subfamily 33. We  
288 also found that several CAZymes involved in metabolising cellulose and hemi-cellulose were differentially  
289 abundant between lines when controlling for diet, including GH5 (subfamilies 19, 37, 48, 44, 18), CE6, GH43  
290 (subfamilies 30, 19, 29, 12), GH115, CE2 and GH67, and between diets when controlling for line, including  
291 GH5 (subfamilies 7 and 48) and GH43 (subfamilies 33, 4 and 35). Gender and DNA extraction batch were not  
292 found to have significantly affected the abundance of CAZymes (PERMANOVA:  $P > 0.05$ ).

293

294 **Figure 5:**

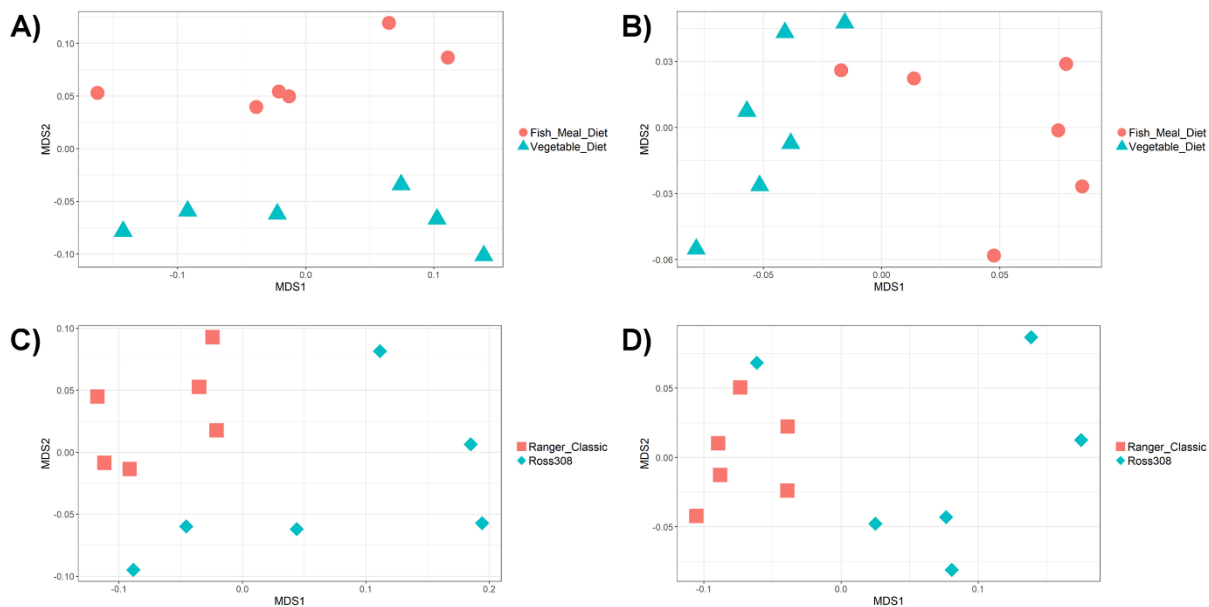

295

296 **NMDS of chicken cecal samples clustered by abundance of MAG CAZymes (Bray-Curtis dissimilarity). A)**  
297 **Ross 308 birds clustered significantly by diet (PERMANOVA:  $P = 0.021$ ) B) Ranger Classic birds did not cluster**  
298 **significantly by diet (PERMANOVA:  $P = 0.095$ ) C) Birds on a vegetable diet did not cluster significantly by**  
299 **line (PERMANOVA:  $P = 0.061$ ) D) Birds on a fish meal diet clustered significantly by line (PERMANOVA:  $P =$**   
300 **0.0065).**

301 **Figure 6:**

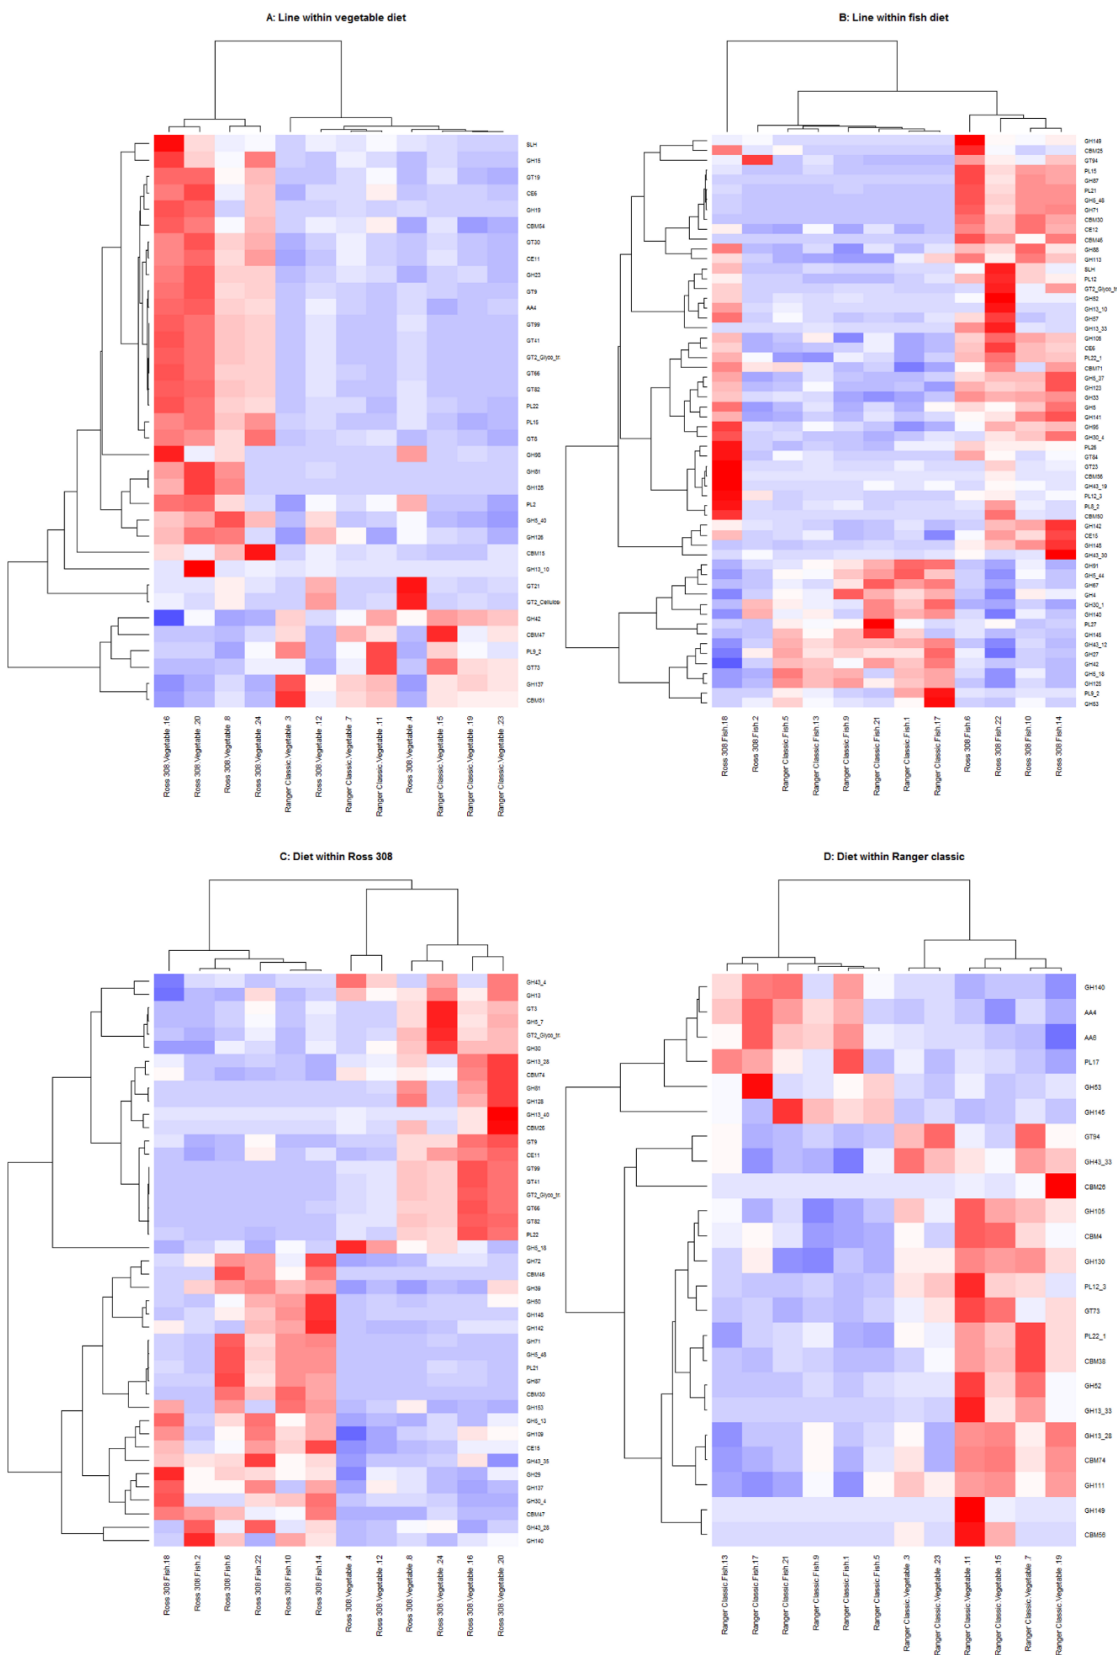

302

303 Heatmap showing the proportional coverage of MAGs which were significantly differently abundant  
304 between groups (Deseq2,  $P \leq 0.05$ ). Euclidean clustering was used to cluster MAGs and samples.



305

## 306 **Line and gender impact the weight of the chicken**

307 As we did not monitor individual feed intake, we cannot comment on the feed-conversion ratio of these  
308 birds; however, when housed and fed as a group, there are clear statistical differences between the birds in  
309 terms of weight (**Supplementary figure 2**). Univariate GLMs with fixed factors of gender, line and diet were  
310 performed, with bird weight as the dependent variable. Both gender ( $P < 0.001$ ) and line ( $P < 0.001$ ) were found  
311 to significantly impact weight, as expected. Diet was not found to significantly affect bird weight overall  
312 ( $P = 0.220$ ). We did observe a significant increase in bird weight in Ranger Classic birds ( $P = 0.007$ ), of both  
313 genders, fed a fish meal diet; which was not observed in the Ross 308 birds ( $P = 0.778$ ).

314

## 315 **Discussion:**

316 The function of the cecal microbiota in commercial chicken flocks remains somewhat unclear (16). However,  
317 several studies have implicated it as playing a role in nutrition, including in the production of SCFAs and the  
318 recycling of nitrogen from uric acid (10, 11, 76). Differences have also been observed in the cecal microbiota  
319 communities between chickens with differing feed efficiencies and abdominal fat accumulation (13-15). It  
320 may therefore be possible to increase chicken productivity by the manipulation of the chicken cecal  
321 microbiota. However, before this is possible we need to develop a good understanding of the types of  
322 bacteria present in the chicken and their nutritional function.

323 In this study we constructed 469 metagenome assembled genomes from chicken cecal contents, greatly  
324 expanding upon previous chicken cecal MAGs (77). 349 of our MAGs had completeness  $> 90\%$  and  
325 contamination  $< 5\%$  and can therefore be classed as high-quality draft genomes as defined by Bower *et al.*  
326 (55). Our MAGs include 460 novel strains and 283 novel species, including 5 novel *Lactobacillus* species. 97  
327 MAGs were able to be identified to species level by GTDB-Tk and a further 246 could be identified to genus.  
328 We also identified 42 novel bacterial genera, 40 of which belonged to the class *Clostridia*. The remaining two  
329 genera belonged to the *Bacilli* class and the *Gastranaerophilales* order of *Cyanobacteria*, and may also belong  
330 to novel taxonomic families.

331 The majority of our MAGs belonged to the orders *Oscillospirales* and *Lachnospirales*, members of the  
332 *Clostridia* class. The high abundance of *Clostridia* observed during our study correlates with several previous  
333 studies examining the chicken cecal microbiota (19, 78-83). This is likely the product of chicks being raised in  
334 an environment where they are not exposed to a maternal microbiota as feral hens and chicks exposed to an  
335 adult hen have microbiotas which are far less dominated by *Firmicutes* and contain higher abundances of  
336 *Bacteroidetes* (84, 85).

337 Within our dataset we found 276 microbes which were on average present at a minimum 1X coverage in all  
338 four of our groups, potentially indicating a core chicken microbiota. However caution must be taken as all of  
339 our chickens were raised in the same facility and samples were all taken at the same time-point, which will  
340 have limited the variability in microbes present. Chicken microbiota can vary across flocks (86), at different  
341 times in the bird's life (87) and between free-range and intensively-reared chickens (88). To provide a truly  
342 representative dataset of chicken microbial genomes it would be necessary to sequence cecal samples from  
343 birds from multiple lines and raised under a variety of conditions. However, we do think it is likely that there  
344 is a core chicken cecal microbiota which is shared across sites and is irrespective of management conditions  
345 having assembled bacterial species that have been found in chickens in previous studies (14, 19, 30, 60). We  
346 also identified several novel *Lactobacillus* strains which have previously been posited as potential chicken  
347 probiotics, including *L.crispatus* (62-64), *L.gallinarum* (65), *L.johnsonii* (66, 67), *L.oris* (68), *L.reuteri* (59, 62,  
348 69) and *L.salivarius* (59, 67, 70).

349 When analysing the abundance of MAGs between birds from different lines, consuming either a vegetable  
350 diet or a diet containing fish meal, we found significant differences in the microbial communities based on  
351 both line and diet. This agrees with previous studies where significant differences have been described in the  
352 intestinal microbiota of chickens from different lines, including those from faster and slower growing lines  
353 (89-91). Differences have also previously been observed in the microbiota when feeding chickens a diet  
354 supplemented with fish meal (31, 32). This correlates with differences observed in the weights of birds fed  
355 the fish meal diet. Ranger Classic birds fed a fish meal diet weighed significantly more than those fed a  
356 vegetable-only diet, whereas there was no significant difference between the weight of the Ross 308 birds  
357 fed on these two diets.

358 Examining those bacteria which were consistently significantly increased in a specific line regardless of diet  
359 or a specific diet regardless of line, the majority of these bacteria are novel species, therefore it is difficult to  
360 hypothesise why they are more abundant in particular bird lines or when birds are fed certain diets. Of those  
361 species that had previously been identified, the two *L.gallinarum* strains were both consistently found to be  
362 more abundant in Ross 308 birds, while *Lachnoclostridium sp. An76* CMAG\_121 and *Faecalibacterium sp.*  
363 *An121* CMAG\_31 were found to be more abundant in birds on the vegetable diet. *L.gallinarum*, is a  
364 homofermentative and thermotolerant (65, 92) species which has previously been suggested as a potential  
365 chicken probiotic (63, 93, 94), while *Lachnoclostridium sp. An76* and *Faecalibacterium sp. An121* (19) have  
366 only very recently been discovered and are therefore not well characterised.

367 We are unsure why *H.pullorum* was observed in such high levels in the Ross 308: Vegetable diet group. We  
368 are unable to rule out contamination from the environment as our groups were housed in separate pens  
369 within the same room. We did not observe any negative health effects in this group, and the bacterium is  
370 very common in some flocks (61, 73-75, 95).

371 We wondered whether the differences in microbiota we observed between groups were associated with  
372 changes in the metabolic potential of the cecal microbial communities. Microbes isolated from the chicken  
373 ceca have previously been shown to have highly variable metabolic pathways (96, 97). We found that the  
374 abundances of certain MAG derived CAZymes involved in starch and cellulose degradation were significantly  
375 differently abundant between lines and diets. These molecules are highly abundant in the predominantly  
376 grain based diets fed to chicken. However, energy from starches and celluloses are not available to the  
377 chicken host unless these are first degraded into smaller carbohydrates by the gut microbiota, therefore  
378 differences between the ability of the cecal microbiota to degrade these molecules may lead to greater  
379 efficiency of energy extraction from feed (81).

380 It is also interesting to note that when analysing the abundance of MAG derived CAZymes in the chicken ceca,  
381 we only observed significantly separate clustering of birds by diet in the Ross 308 birds and by line in animals  
382 that were consuming the fish meal diet. This indicates that the differences in MAG abundances for these  
383 groups resulted in significantly different pools of metabolic genes. However, significant differences in MAG  
384 abundances were also observed for Ranger Classics on the two diets and for chickens of different lines  
385 consuming the vegetable diet, but this did not result in a significant difference in the total abundance of the  
386 CAZyme. This finding serves to highlight that changes in microbiota community composition do not  
387 necessarily lead to significant changes in the total metabolic potential of that community, although it is  
388 possible more significant differences would be observed with a larger sample size. It is worth noting that  
389 while our Ross 308 vegetable diet group contained 4 males and 2 females and the other groups contained 3  
390 males and 3 females, gender was found to have no impact on the abundance of CAZymes or MAGs and this  
391 therefore should not have impacted our results.

392 One outlier was observed in our data: Chicken 2 appeared to cluster separately by the abundance of its MAGs  
393 in comparison to other Ross 308 birds consuming a fish meal diet, supporting the idea that while diet and  
394 line are associated with differences in the microbiota, variation will still exist between birds of the same line  
395 consuming similar diets. It should also be noted that the individual feed intake of each bird was not measured,  
396 meaning that some birds may have consumed different quantities of food, which could lead to variation in  
397 their microbiota compositions.

398 In conclusion, through the construction of metagenome assembled genomes we have greatly increased the  
399 quantity of chicken derived microbial genomes present in public databases and our data can be used as a  
400 reference dataset in future metagenomic studies. While previous studies have demonstrated that *Clostridia*  
401 are very common in the chicken ceca, our study shows that within this class there is a wide diversity of species  
402 present, something which has perhaps been underestimated by culture based studies. To gain a mechanistic  
403 insight into the function of these bacteria and to capture the wide-diversity of bacteria present in chickens,  
404 large-scale culture based studies will be necessary.

405

406 **Acknowledgements:**

407 We would like to thank the staff at the Greenwood Building, Roslin Institute for the care of our animals. We  
408 would also like to thank Denny Gorman for his help with sample preparations. The Roslin Institute forms  
409 part of the Royal (Dick) School of Veterinary Studies, University of Edinburgh. This project was supported by  
410 the Biotechnology and Biological Sciences Research Council, including institute strategic programme and  
411 national capability awards to The Roslin Institute (BBSRC: BB/P013759/1, BB/P013732/1, BB/J004235/1,  
412 BB/J004243/1). MJP is supported by the Quadram Institute Bioscience BBSRC-funded Strategic Program:  
413 Microbes in the Food Chain (Project No. BB/R012504/1) and its constituent project BBS/E/F/000PR10351  
414 (Theme 3, Microbial Communities in the Food Chain) and by the Medical Research Council CLIMB grant  
415 (MR/L015080/1)

416

417 **References:**

- 418 1. Food, Nations AOotU. FAOSTAT database. FAO Rome, Italy; 2019.
- 419 2. Bennett CE, Thomas R, Williams M, Zalasiewicz J, Edgeworth M, Miller H, et al. The broiler chicken  
420 as a signal of a human reconfigured biosphere. *R Soc Open Sci.* 2018;5(12):11.
- 421 3. Ritchie H, Roser M. Meat and Seafood Production & Consumption 2019 [
- 422 4. OECD/FAO. Meat. OECD-FAO Agricultural Outlook 2016-2025: OECD Publishing, Paris; 2016.
- 423 5. Prall GFW, van der Steen HAM, Plastow GS. Application of genomics to the pork industry. *Journal of*  
424 *Animal Science.* 2005;83(suppl\_13):E1-E8.
- 425 6. Gill M, Smith P, Wilkinson JM. Mitigating climate change: The role of domestic livestock. *Animal.*  
426 2010;4(3):323-33.
- 427 7. Kabir SML. The role of probiotics in the poultry industry. *Int J Mol Sci.* 2009;10(8):3531-46.
- 428 8. Clavijo V, Florez MJV. The gastrointestinal microbiome and its association with the control of  
429 pathogens in broiler chicken production: A review. *Poultry Science.* 2018;97(3):1006-21.
- 430 9. Crhanova M, Hradecka H, Faldynova M, Matulova M, Havlickova H, Sisak F, et al. Immune response  
431 of chicken gut to natural colonization by gut microflora and to *Salmonella enterica* Serovar *Enteritidis*  
432 infection. *Infection and Immunity.* 2011;79(7):2755-63.
- 433 10. Jozefiak D, Rutkowski A, Martin SA. Carbohydrate fermentation in the avian ceca: A review. *Animal*  
434 *Feed Science and Technology.* 2004;113(1-4):1-15.
- 435 11. Karasawa Y. Significant role of the nitrogen recycling system through the ceca occurs in protein-  
436 depleted chickens. *J Exp Zool.* 1999;283(4-5):418-25.
- 437 12. Parsons CM, Potter LM, Brown RD. Effects of dietary carbohydrate and of intestinal microflora on  
438 excretion of endogenous amino-acids by poultry. *Poultry Science.* 1983;62(3):483-9.
- 439 13. Wen C, Yan W, Sun C, Ji C, Zhou Q, Zhang D, et al. The gut microbiota is largely independent of host  
440 genetics in regulating fat deposition in chickens. *The ISME Journal.* 2019.
- 441 14. Mignon-Grasteau S, Nancy A, Rideau N, Chantry-Darmon C, Boscher M-Y, Sellier N, et al. Impact of  
442 selection for digestive efficiency on microbiota composition in the chicken. *PLOS ONE.*  
443 2015;10(8):e0135488.
- 444 15. Stanley D, Denman SE, Hughes RJ, Geier MS, Crowley TM, Chen HL, et al. Intestinal microbiota  
445 associated with differential feed conversion efficiency in chickens. *Applied Microbiology and Biotechnology.*  
446 2012;96(5):1361-9.
- 447 16. Svihus B, Choct M, Classen HL. Function and nutritional roles of the avian caeca: A review. *Worlds*  
448 *Poult Sci J.* 2013;69(2):249-63.

- 449 17. Watson M. Illuminating the future of DNA sequencing. *Genome Biol.* 2014;15(2):2.  
450 18. Loman NJ, Watson M. Successful test launch for nanopore sequencing. *Nat Methods.*  
451 2015;12(4):303-4.  
452 19. Medvecky M, Cejkova D, Polansky O, Karasova D, Kubasova T, Cizek A, et al. Whole genome  
453 sequencing and function prediction of 133 gut anaerobes isolated from chicken caecum in pure cultures.  
454 *BMC Genomics.* 2018;19(1):561.  
455 20. Sangwan N, Xia FF, Gilbert JA. Recovering complete and draft population genomes from  
456 metagenome datasets. *Microbiome.* 2016;4:11.  
457 21. Kang DWD, Froula J, Egan R, Wang Z. MetaBAT, an efficient tool for accurately reconstructing single  
458 genomes from complex microbial communities. *PeerJ.* 2015;3:15.  
459 22. Pasolli E, Asnicar F, Manara S, Zolfo M, Karcher N, Armanini F, et al. Extensive unexplored human  
460 microbiome diversity revealed by over 150,000 genomes from metagenomes spanning age, geography, and  
461 lifestyle. *Cell.* 2019;176(3):649-+.  
462 23. Almeida A, Mitchell AL, Boland M, Forster SC, Gloor GB, Tarkowska A, et al. A new genomic  
463 blueprint of the human gut microbiota. *Nature.* 2019;568(7753):499-+.  
464 24. Stewart RD, Auffret MD, Warr A, Walker AW, Roehe R, Watson M. The genomic and proteomic  
465 landscape of the rumen microbiome revealed by comprehensive genome-resolved metagenomics. *bioRxiv.*  
466 2018:489443.  
467 25. Stewart RD, Auffret MD, Warr A, Wiser AH, Press MO, Langford KW, et al. Assembly of 913  
468 microbial genomes from metagenomic sequencing of the cow rumen. *Nat Commun.* 2018;9:11.  
469 26. Wang W, Hu H, Zijlstra RT, Zheng J, Gänzle MG. Metagenomic reconstructions of gut microbial  
470 metabolism in weanling pigs. *Microbiome.* 2019;7(1):48.  
471 27. Iverson V, Morris RM, Frazar CD, Berthiaume CT, Morales RL, Armbrust EV. Untangling genomes  
472 from metagenomes: Revealing an uncultured class of marine euryarchaeota. *Science.* 2012;335(6068):587-  
473 90.  
474 28. Hugerth LW, Larsson J, Alneberg J, Lindh MV, Legrand C, Pinhassi J, et al. Metagenome-assembled  
475 genomes uncover a global brackish microbiome. *Genome Biol.* 2015;16:18.  
476 29. Anantharaman K, Brown CT, Hug LA, Sharon I, Castelle CJ, Probst AJ, et al. Thousands of microbial  
477 genomes shed light on interconnected biogeochemical processes in an aquifer system. *Nat Commun.*  
478 2016;7:11.  
479 30. Parks DH, Rinke C, Chuvochina M, Chaumeil PA, Woodcroft BJ, Evans PN, et al. Recovery of nearly  
480 8,000 metagenome-assembled genomes substantially expands the tree of life. *Nat Microbiol.*  
481 2017;2(11):1533-42.  
482 31. Wu SB, Stanley D, Rodgers N, Swick RA, Moore RJ. Two necrotic enteritis predisposing factors,  
483 dietary fishmeal and *Eimeria* infection, induce large changes in the caecal microbiota of broiler chickens.  
484 *Vet Microbiol.* 2014;169(3-4):188-97.  
485 32. Stanley D, Wu SB, Rodgers N, Swick RA, Moore RJ. Differential responses of cecal microbiota to  
486 fishmeal, *Eimeria* and *Clostridium perfringens* in a necrotic enteritis challenge model in chickens. *Plos One.*  
487 2014;9(8):10.  
488 33. Glendinning L, Wright S, Pollock J, Tennant P, Collie D, McLachlan G. Variability of the sheep lung  
489 microbiota. *Appl Environ Microbiol.* 2016;82(11):3225-38.  
490 34. Bolger AM, Lohse M, Usadel B. Trimmomatic: A flexible trimmer for Illumina sequence data.  
491 *Bioinformatics.* 2014;30(15):2114-20.  
492 35. Peng Y, Leung HCM, Yiu SM, Chin FYL. IDBA-UD: A de novo assembler for single-cell and  
493 metagenomic sequencing data with highly uneven depth. *Bioinformatics.* 2012;28(11):1420-8.  
494 36. Li H. Aligning sequence reads, clone sequences and assembly contigs with BWA-MEM. *arXiv*  
495 preprint arXiv:13033997. 2013.  
496 37. Li H, Handsaker B, Wysoker A, Fennell T, Ruan J, Homer N, et al. The Sequence Alignment/Map  
497 format and SAMtools. *Bioinformatics.* 2009;25(16):2078-9.  
498 38. Li DH, Liu CM, Luo RB, Sadakane K, Lam TW. MEGAHIT: An ultra-fast single-node solution for large  
499 and complex metagenomics assembly via succinct de Bruijn graph. *Bioinformatics.* 2015;31(10):1674-6.



- 500 39. Olm MR, Brown CT, Brooks B, Banfield JF. dRep: A tool for fast and accurate genomic comparisons  
501 that enables improved genome recovery from metagenomes through de-replication. *Isme J.*  
502 2017;11(12):2864-8.
- 503 40. Parks D. CompareM. <https://github.com/dparks1134/CompareM2019>.
- 504 41. Parks DH, Imelfort M, Skennerton CT, Hugenholtz P, Tyson GW. CheckM: Assessing the quality of  
505 microbial genomes recovered from isolates, single cells, and metagenomes. *Genome Research.*  
506 2015;25(7):1043-55.
- 507 42. Parks DH, Chuvochina M, Waite DW, Rinke C, Skarszewski A, Chaumeil PA, et al. A standardized  
508 bacterial taxonomy based on genome phylogeny substantially revises the tree of life. *Nat Biotechnol.*  
509 2018;36(10):996-+.
- 510 43. Stewart RD, Auffret MD, Snelling TJ, Roehe R, Watson M. MAGpy: A reproducible pipeline for the  
511 downstream analysis of metagenome-assembled genomes (MAGs). *Bioinformatics.* 2018:bty905.
- 512 44. Rambaut A. FigTree v1. 4. <http://treebioedacuk/software/figtree2012>.
- 513 45. Asnicar F, Weingart G, Tickle TL, Huttenhower C, Segata N. Compact graphical representation of  
514 phylogenetic data and metadata with GraPhlAn. *PeerJ.* 2015;3:17.
- 515 46. Luo CW, Rodriguez LM, Konstantinidis KT. MyTaxa: An advanced taxonomic classifier for genomic  
516 and metagenomic sequences. *Nucleic Acids Res.* 2014;42(8):12.
- 517 47. Parker CT, Tindall BJ, Garrity GM. International code of nomenclature of prokaryotes: Prokaryotic  
518 code (2008 revision). *Int J Syst Evol Microbiol.* 2019;69(1A):S7-S111.
- 519 48. Cantarel BL, Coutinho PM, Rancurel C, Bernard T, Lombard V, Henrissat B. The Carbohydrate-Active  
520 EnZymes database (CAZy): An expert resource for Glycogenomics. *Nucleic Acids Res.* 2009;37:D233-D8.
- 521 49. Buchfink B, Xie C, Huson DH. Fast and sensitive protein alignment using DIAMOND. *Nat Methods.*  
522 2015;12(1):59-60.
- 523 50. Team RC. R: A language and environment for statistical computing. 2013.
- 524 51. Oksanen J, Blanchet FG, Friendly M, Kindt R, Legendre P, McGlinn D, et al. vegan: Community  
525 Ecology Package. R package version 25-2 <https://CRANR-projectorg/package=vegan2013>.
- 526 52. Wickham H. ggplot2: Elegant graphics for data analysis. <http://ggplot2org2016>.
- 527 53. Lex A, Gehlenborg N, Strobel H, Vuillemot R, Pfister H. UpSet: Visualization of intersecting sets.  
528 *IEEE Trans Vis Comput Graph.* 2014;20(12):1983-92.
- 529 54. Love MI, Huber W, Anders S. Moderated estimation of fold change and dispersion for RNA-seq data  
530 with DESeq2. *Genome Biol.* 2014;15(12):38.
- 531 55. Bowers RM, Kyrpides NC, Stepanauskas R, Harmon-Smith M, Doud D, Reddy TBK, et al. Minimum  
532 information about a single amplified genome (MISAG) and a metagenome- assembled genome (MIMAG) of  
533 bacteria and archaea. *Nat Biotechnol.* 2018;36(7):660-.
- 534 56. van der Wielen P, Rovers G, Scheepens JMA, Biesterveld S. *Clostridium lactatifermentans* sp nov., a  
535 lactate-fermenting anaerobe isolated from the caeca of a chicken. *Int J Syst Evol Microbiol.* 2002;52:921-5.
- 536 57. Boerlin P, Nicholson V, Brash M, Slavic D, Boyen F, Sanei B, et al. Diversity of *Enterococcus cecorum*  
537 from chickens. *Vet Microbiol.* 2012;157(3-4):405-11.
- 538 58. Awad WA, Mann E, Dzieciol M, Hess C, Schmitz-Esser S, Wagner M, et al. Age-related differences in  
539 the luminal and mucosa-associated gut microbiome of broiler chickens and shifts associated with  
540 *Campylobacter jejuni* infection. *Frontiers in Cellular and Infection Microbiology.* 2016;6(154).
- 541 59. Yu H, Si W, Gong J, Forster RJ, Yang C, Huang R, et al. 16S rRNA gene-based analysis of mucosa-  
542 associated bacterial community and phylogeny in the chicken gastrointestinal tracts: From crops to ceca.  
543 *FEMS Microbiology Ecology.* 2007;59(1):147-57.
- 544 60. Duggett NA, Kay GL, Sergeant MJ, Bedford M, Constantinidou CI, Penn CW, et al. Draft genome  
545 sequences of six novel bacterial isolates from chicken ceca. *Genome Announcements.* 2016;4(3):e00448-  
546 16.
- 547 61. Stanley J, Linton D, Burnens AP, Dewhirst FE, On SLW, Porter A, et al. *Helicobacter pullorum* sp. nov.  
548 - genotype and phenotype of a new species isolated from poultry and from human patients with  
549 gastroenteritis. *Microbiol-UK.* 1994;140:3441-9.
- 550 62. Lu J, Idris U, Harmon B, Hofacre C, Maurer JJ, Lee MD. Diversity and succession of the intestinal  
551 bacterial community of the maturing broiler chicken. *Appl Environ Microbiol.* 2003;69(11):6816.



- 552 63. Neal-McKinney JM, Lu X, Duong T, Larson CL, Call DR, Shah DH, et al. Production of organic acids by  
553 probiotic Lactobacilli can be used to reduce pathogen load in poultry. PLOS ONE. 2012;7(9):e43928.
- 554 64. Beasley SS, Takala TM, Reunanen J, Apajalahti J, Saris PEJ. Characterization and  
555 electrotransformation of *Lactobacillus Crispatus* isolated from chicken crop and intestine. Poultry Science.  
556 2004;83(1):45-8.
- 557 65. Fujisawa T, Benno Y, Yaeshima T, Mitsuoka T. Taxonomic study of the lactobacillus-acidophilus  
558 group, with recognition of *lactobacillus-gallinarum* sp-nov and *lactobacillus-johnsonii* sp-nov and synonymy  
559 of *lactobacillus-acidophilus* group-a3 (johnson et-al 1980) with the type strain of *lactobacillus-amylovorus*  
560 (nakamura 1981). Int J Syst Bacteriol. 1992;42(3):487-91.
- 561 66. Taheri HR, Moravej H, Tabandeh F, Zaghari M, Shivazad M. Efficacy of combined or single use of  
562 *Lactobacillus crispatus* LT116 and *L. johnsonii* LT171 on broiler performance British Poultry Science.  
563 2010;51(5):580-5.
- 564 67. Bjerrum L, Engberg RM, Leser TD, Jensen BB, Finster K, Pedersen K. Microbial community  
565 composition of the ileum and cecum of broiler chickens as revealed by molecular and culture-based  
566 techniques. Poultry Science. 2006;85(7):1151-64.
- 567 68. Dec M, Nowaczek A, Urban-Chmiel R, Stepień-Pysniak D, Wernicki A. Probiotic potential of  
568 Lactobacillus isolates of chicken origin with anti-Campylobacter activity. J Vet Med Sci. 2018;80(8):1195-  
569 203.
- 570 69. Yu B, Liu JR, Hsiao FS, Chiou PWS. Evaluation of *Lactobacillus reuteri* Pg4 strain expressing  
571 heterologous  $\beta$ -glucanase as a probiotic in poultry diets based on barley. Animal Feed Science and  
572 Technology. 2008;141(1):82-91.
- 573 70. Saint-Cyr MJ, Haddad N, Taminiau B, Poezevara T, Quesne S, Amelot M, et al. Use of the potential  
574 probiotic strain *Lactobacillus salivarius* SMXD51 to control *Campylobacter jejuni* in broilers. International  
575 Journal of Food Microbiology. 2017;247:9-17.
- 576 71. Orata FD, Meier-Kolthoff JP, Sauvageau D, Stein LY. Phylogenomic analysis of the  
577 Gammaproteobacterial Methanotrophs (order Methylococcales) calls for the reclassification of members at  
578 the genus and species levels. Front Microbiol. 2018;9:17.
- 579 72. Konstantinidis KT, Tiedje JM. Towards a genome-based taxonomy for prokaryotes. J Bacteriol.  
580 2005;187(18):6258-64.
- 581 73. Zaroni RG, Rossi M, Giacomucci D, Sanguinetti V, Manfreda G. Occurrence and antibiotic  
582 susceptibility of *Helicobacter pullorum* from broiler chickens and commercial laying hens in Italy.  
583 International Journal of Food Microbiology. 2007;116(1):168-73.
- 584 74. Ceelen LM, Decostere A, Van den Buick K, On SLW, Baele M, Ducatelle R, et al. *Helicobacter*  
585 *pullorum* in chickens, Belgium. Emerg Infect Dis. 2006;12(2):263-7.
- 586 75. Kaakoush NO, Sodhi N, Chenu JW, Cox JM, Riordan SM, Mitchell HM. The interplay between  
587 *Campylobacter* and *Helicobacter* species and other gastrointestinal microbiota of commercial broiler  
588 chickens. Gut Pathogens. 2014;6:10.
- 589 76. Lei F, Yin YS, Wang YZ, Deng B, Yu HD, Li LJ, et al. Higher-level production of volatile fatty acids in  
590 vitro by chicken gut microbiotas than by human gut microbiotas as determined by functional analyses. Appl  
591 Environ Microbiol. 2012;78(16):5763-72.
- 592 77. Sergeant MJ, Constantinidou C, Cogan TA, Bedford MR, Penn CW, Pallen MJ. Extensive microbial  
593 and functional diversity within the chicken cecal microbiome. Plos One. 2014;9(3):13.
- 594 78. Ballou AL, Ali RA, Mendoza MA, Ellis JC, Hassan HM, Croom WJ, et al. Development of the chick  
595 microbiome: How early exposure influences Future Microbial Diversity. Front Vet Sci. 2016;3:12.
- 596 79. Oakley BB, Buhr RJ, Ritz CW, Kiepper BH, Berrang ME, Seal BS, et al. Successional changes in the  
597 chicken cecal microbiome during 42 days of growth are independent of organic acid feed additives. BMC  
598 Vet Res. 2014;10:8.
- 599 80. Sekelja M, Rud I, Knutsen SH, Denstadli V, Westereeng B, Naes T, et al. Abrupt temporal fluctuations  
600 in the chicken fecal microbiota are explained by its gastrointestinal origin. Appl Environ Microbiol.  
601 2012;78(8):2941-8.
- 602 81. Stanley D, Geier MS, Denman SE, Haring VR, Crowley TM, Hughes RJ, et al. Identification of chicken  
603 intestinal microbiota correlated with the efficiency of energy extraction from feed. Vet Microbiol.  
604 2013;164(1-2):85-92.

- 605 82. Wei S, Morrison M, Yu Z. Bacterial census of poultry intestinal microbiome. *Poultry Science*.  
606 2013;92(3):671-83.
- 607 83. Hieke ASC, Hubert SM, Athrey G. Circadian disruption and divergent microbiota acquisition under  
608 extended photoperiod regimens in chicken. *PeerJ*. 2019;7:28.
- 609 84. Kubasova T, Kollarcikova M, Crhanova M, Karasova D, Cejkova D, Sebkova A, et al. Contact with  
610 adult hen affects development of caecal microbiota in newly hatched chicks. *Plos One*. 2019;14(3):13.
- 611 85. Ferrario C, Alessandri G, Mancabelli L, Gering E, Mangifesta M, Milani C, et al. Untangling the cecal  
612 microbiota of feral chickens by culturomic and metagenomic analyses. *Environ Microbiol*.  
613 2017;19(11):4771-83.
- 614 86. Stanley D, Geier MS, Hughes RJ, Denman SE, Moore RJ. Highly variable microbiota development in  
615 the chicken gastrointestinal tract. *Plos One*. 2013;8(12):7.
- 616 87. Videnska P, Sedlar K, Lukac M, Faldynova M, Gerzova L, Cejkova D, et al. Succession and  
617 replacement of bacterial populations in the caecum of egg laying hens over their whole life. *Plos One*.  
618 2014;9(12):14.
- 619 88. Mancabelli L, Ferrario C, Milani C, Mangifesta M, Turrone F, Duranti S, et al. Insights into the  
620 biodiversity of the gut microbiota of broiler chickens. *Environ Microbiol*. 2016;18(12):4727-38.
- 621 89. Ding JM, Zhao LL, Wang LF, Zhao WJ, Zhai ZX, Leng L, et al. Divergent selection-induced obesity  
622 alters the composition and functional pathways of chicken gut microbiota. *Genet Sel Evol*. 2016;48:9.
- 623 90. Ocejo M, Oporto B, Hurtado A. 16S rRNA amplicon sequencing characterization of caecal  
624 microbiome composition of broilers and free-range slow-growing chickens throughout their productive  
625 lifespan. *Sci Rep*. 2019;9:14.
- 626 91. Pandit RJ, Hinsu AT, Patel NV, Koringa PG, Jakhesara SJ, Thakkar JR, et al. Microbial diversity and  
627 community composition of caecal microbiota in commercial and indigenous Indian chickens determined  
628 using 16s rDNA amplicon sequencing. *Microbiome*. 2018;6:13.
- 629 92. Jebava I, Chuat V, Lortal S, Valence F. Peptidoglycan hydrolases as species-specific markers to  
630 differentiate *Lactobacillus helveticus* from *Lactobacillus gallinarum* and other closely related  
631 homofermentative Lactobacilli. *Curr Microbiol*. 2014;68(4):551-7.
- 632 93. Saminathan M, Sieo CC, Kalavathy R, Abdullah N, Ho YW. Effect of prebiotic oligosaccharides on  
633 growth of *Lactobacillus* strains used as a probiotic for chickens. *Afr J Microbiol Res*. 2011;5(1):57-64.
- 634 94. Askelson TE, Campasino A, Lee JT, Duong T. Evaluation of phytate-degrading *Lactobacillus* culture  
635 administration to broiler chickens. *Appl Environ Microbiol*. 2014;80(3):943-50.
- 636 95. Manfreda G, Parisi A, Lucchi A, Zanoni RG, De Cesare A. Prevalence of *Helicobacter pullorum* in  
637 conventional, organic, and free-range broilers and typing of isolates. *Appl Environ Microbiol*.  
638 2011;77(2):479-84.
- 639 96. Eeckhaut V, Van Immerseel F, Croubels S, De Baere S, Haesebrouck F, Ducatelle R, et al. Butyrate  
640 production in phylogenetically diverse Firmicutes isolated from the chicken caecum. *Microb Biotechnol*.  
641 2011;4(4):503-12.
- 642 97. Polansky O, Sekelova Z, Faldynova M, Sebkova A, Sisak F, Rychlik I. Important metabolic pathways  
643 and biological processes expressed by chicken cecal microbiota. *Appl Environ Microbiol*. 2016;82(5):1569-  
644 76.

645

646

#### 647 **Dataset legends:**

648 **Dataset 1:** Average coverage of MAGs in all samples. Coverage was calculated by mapping MAG scaffolds to  
649 the adaptor trimmed Illumina reads for each sample. The average coverage of the scaffolds from a mag within  
650 a sample were taken as the average abundance of that mag in the sample.

651 **Dataset 2:** Description of each chicken MAG (metagenome-assembled genome), including novelty of species  
652 or strain, NCBI\_name, GTDB-Tk\_taxonomy, CheckM completeness and contamination, assembly size (mb),  
653 N50, number of contigs, the longest contig length (bp) and the GC content.

654 **Dataset 3:** Taxonomy assigned by MAGpy to MAGs.

655 **Dataset 4:** Clustering of samples at 60% AAI to form genus clusters. Novel genera were defined as clusters of  
656 MAGs at 60% AAI which were not assigned a genus by GTDB-Tk

657 **Dataset 5:** MAGs which were identified as being significantly more abundant by DESeq2 between diets and  
658 lines.

659 **Dataset 6:** CAZymes which were identified as being significantly more abundant by DESeq2 between diets  
660 and lines.
