1 Assembly of hundreds of novel bacterial genomes from the chicken caecum

2 Authors: Laura Glendinning<sup>1</sup>, Robert D. Stewart<sup>1</sup>, Mark J. Pallen<sup>2,3,4</sup>, Kellie A. Watson<sup>1</sup>, Mick Watson<sup>1</sup>

3 <sup>1</sup>Genetics and Genomics, The Roslin Institute and Royal (Dick) School of Veterinary Studies, University of  
4 Edinburgh, Edinburgh, Midlothian, United Kingdom

5 <sup>2</sup>Microbes in the Food Chain, Quadram Institute Bioscience, Norwich, UK

6 <sup>3</sup>School of Biological Sciences, University of East Anglia, Norwich, Norfolk, UK

7 <sup>4</sup>School of Veterinary Medicine, University of Surrey, Guildford, Surrey, UK

8

9 **Abstract:**

10 Chickens are a highly important source of protein for a large proportion of the human population. The  
11 caecal microbiota plays a crucial role in chicken nutrition through the production of short chain fatty acids,  
12 nitrogen recycling and amino acid production. In this study we sequenced DNA from caecal contents  
13 samples taken from 24 chickens belonging to either a fast or slower growing breed consuming either a  
14 vegetable-only diet or a diet containing fish meal. We utilised 1.6T of Illumina data to construct 469 draft  
15 metagenome-assembled bacterial genomes, including 460 novel strains, 283 novel species and 42 novel  
16 genera. We compared our genomes to data from eight EU countries and show that these genomes are  
17 abundant within European chicken flocks. We also compared the abundance of our genomes, and the  
18 carbohydrate active enzymes they produce, between our chicken groups and demonstrate that there are  
19 both breed- and diet- specific microbiomes, as well as an overlapping core microbiome. This data will form  
20 the basis for future studies examining the composition and function of the chicken caecal microbiota.

21

22 **Background:**

23 There are an estimated 23 billion live chickens on the planet at any one time (1), out-numbering humans by  
24 over 3:1. As most of these are reared for food, the actual number of chickens produced per year is even  
25 higher, at almost 65 billion, leading some to speculate that the accumulation of chicken bones in the fossil  
26 record will be used by future archaeologists as a unique marker for the Anthropocene (2).

27 Since the 1960s, worldwide chicken meat production has increased by over ten times (3). Global meat  
28 production is predicted to be 16% higher in 2025 vs. 2015, with most of this increase originating from  
29 poultry meat production (4). Part of the popularity of chicken meat is that, due to intensive selection,  
30 chickens have been developed which are highly productive in terms of their growth rate with efficient feed  
31 conversion ratios (the rate at which chickens convert feed into muscle), decreasing from 3.0 in the 1960s to

32 1.7 in 2005 (5), making them a cheap source of protein in comparison to other livestock. Chickens also  
33 produce less greenhouse gasses per kg of meat than pigs, cattle and sheep (6). The potential to manipulate  
34 the microbiota in chickens to gain further increases in productivity is of great commercial and scientific  
35 interest, leading to the use of probiotics across the poultry industry (7).

36 As well as playing an important role in pathogen protection (8) and immune system development (9), the  
37 microbiota of the chicken also plays a crucial nutritional role. The largest concentration of microbial cells in  
38 the chicken gastrointestinal tract can be found in the caeca and thereby the majority of chicken microbiota  
39 studies focus primarily on these microbial communities. Members of the caecal microbiota are able to  
40 produce short chain fatty acids (SCFAs) such as acetate, butyrate, lactate and propionate from  
41 carbohydrate sources which have passed through the small intestine; these SCFAs are then able to be  
42 absorbed by the bird and used as an energy source (10). Members of the chicken caecal microbiota have  
43 also been implicated in the recycling of nitrogen by the degradation of nitrogenous compounds (11) and  
44 the synthesis of amino acids (12). One study demonstrated that 21% of the variation in chicken abdominal  
45 fat mass could be attributed to the caecal microbiota composition, when controlling for host genetic effects  
46 (13). Differences have also been observed between birds with high and low feed efficiency (14, 15).  
47 However, despite extensive research over many decades, the quantitative importance of the caeca in  
48 chicken nutrition remains unclear (16), and relatively few microbes commensal in the chicken gut have  
49 been sequenced and deposited in public repositories.

50 The emergence of cheaper DNA sequencing technologies (17, 18) has led to an explosion in studies which  
51 have sought to characterise the chicken gastrointestinal microbiota, particularly using 16S rRNA gene based  
52 methods. Using this methodology, it has been found that the chicken caecal microbiota in the first few  
53 weeks of life is predominantly colonised by members of the *Firmicutes*, mostly of the order *Clostridiales* (8,  
54 19). Whilst valuable, marker-gene studies do not enable an in-depth functional and genomic  
55 characterisation of the microbiome. Some microbes from the chicken caeca have been successfully cultured  
56 and sequenced, including 133 gut anaerobe strains representing a few dozen species with a wide range of  
57 metabolic potentials (20); however it is highly unlikely that these microbes represent the entire diversity of  
58 the chicken caecal microbiota, due to the difficulty in culturing many anaerobic gut microorganisms. One  
59 method which avoids this issue of culturability is the construction of metagenome assembled genomes  
60 (MAGs). Due to improvements in computational power and sequencing technologies, and the development  
61 of new computational approaches (21, 22), it is now possible to accurately bin short-read metagenomic  
62 data into high-quality genomes. Using this technique thousands of MAGs have been generated from  
63 various environments, including humans (23, 24), chickens (25) the rumen (26, 27), pig faeces (28), marine  
64 surface waters (29, 30), an underground aquifer system (31) and other public datasets (32).

65 In this study we sought to use metagenomic sequencing, assembly and binning to investigate the chicken  
66 caecal microbiota. In order to maximise diversity, we chose two commercial bird genotypes with different

67 growth phenotypes, fed two different diets. This also allows us to look at the effects of breed and diet on  
68 strain level microbial abundance. The lines chosen for the study are Ross 308, a fast growing broiler breed,  
69 and the Ranger Classic, a slower growing broiler aimed at free-range, organic farms. All birds were fed  
70 either a vegetable-only diet or a diet based on fish meal as the protein source. The inclusion of fish meal in  
71 chicken diets has previously been linked to changes in the caecal microbiota and is correlated with an  
72 increased risk of necrotic enteritis (33, 34). We assemble 460 novel microbial strains, predicted to  
73 represent 283 novel microbial species and 42 novel microbial genera from the chicken microbiome, and go  
74 on to demonstrate both a breed- and diet- specific microbiota. We also demonstrate that our microbial  
75 genomes are abundant within European chicken flocks and represent the majority of reads from eight  
76 farms which were part of a pan-EU study examining antimicrobial resistance (AMR) in broilers (35). Whilst  
77 we show that large numbers of strains are shared between our birds, it is their relative abundance that  
78 largely drives breed and diet effects. This is the first large-scale binning of the chicken caecal microbiota,  
79 and we believe these data will form the basis for future studies of the structure and function of the chicken  
80 gut microbiome.

81

## 82 **Methods:**

### 83 **Ethical statement**

84 Animals were housed in premises licensed under a UK Home Office Establishment License within the terms  
85 of the UK Home Office Animals (Scientific Procedures) Act 1986. Housing and husbandry complied with the  
86 Code of Practice for Housing and Care of Animals Bred, Supplied or Used for Scientific Purposes and were  
87 overseen by the Roslin Institute Animal Welfare and Ethical Review Board. Animals were culled by schedule  
88 one methods authorized by the Animals (Scientific Procedures) Act 1986.

89

### 90 **Study design**

91 Ross 308 (Aviagen, UK) (n=12) and Ranger Classic (Aviagen, UK) (n=12) chickens were hatched and housed  
92 at the National Avian Research Facility in Edinburgh (UK). Birds were fed either a vegetable only diet or a  
93 diet supplemented with fish meal (**Table 1, Supplementary table 1**) (Diet formulation: **Supplementary**  
94 **tables 2 and 3**, nutritional info: **Supplementary table 4**). Birds received Mareks-Rispins vaccinations  
95 (Merial, France) at 1-2 days of age and were housed by group in separate floor pens (within the same  
96 room) with wood shaving bedding, and receiving food and water ad libitum. Stocking densities were based  
97 on UK Home Office Animals (Scientific Procedures) Act 1986, resulting in a floor area per bird of 0.133 m<sup>2</sup> at  
98 5 weeks of age. Birds were euthanized by cervical dislocation at 5 weeks of age and caecal content samples  
99 were collected. Contents from both caeca were pooled to make one sample per bird. Samples were stored  
100 at 4°C for a maximum of 24 hours until DNA extraction, except for those from DNA extraction batch 2 which

101 were frozen at -20°C for 9 days prior to DNA extraction (**Supplementary table 5**). DNA extraction was  
102 performed as described previously using the DNeasy PowerLyzer PowerSoil Kit (Qiagen, UK) (36). Shotgun  
103 sequencing was performed on a NovaSeq (Illumina) producing 150bp paired-end reads.

104

105 **Table 1: Chicken details**

| Line           | Diet           | N                    | Mean body weight (kg)      |
|----------------|----------------|----------------------|----------------------------|
| Ranger Classic | Fish meal diet | 6 (3 male, 3 female) | Female: 1.89<br>Male: 2.13 |
|                | Vegetable diet | 6 (3 male, 3 female) | Female: 1.57<br>Male: 1.94 |
| Ross 308       | Fish meal diet | 6 (3 male, 3 female) | Female: 2.33<br>Male: 2.70 |
|                | Vegetable diet | 6 (4 male, 2 female) | Female: 2.23<br>Male: 2.89 |

106

## 107 **Bioinformatics**

108 Assembly and binning was carried out as previously described (26, 27). Illumina adaptors were removed  
109 using trimmomatic (37). Single sample assemblies were performed using IDBA-UD (38) with the options --  
110 num\_threads 16 --pre\_correction --min\_contig 300. BWA MEM (39) was used to separately map reads from  
111 every sample back to every assembly. SAMtools (40) was used to create BAM files and the command  
112 jgi\_summarize\_bam\_contig\_depths was run on all BAM files for each assembly to calculate coverage. A  
113 coassembly was also carried out on all 24 samples using MEGAHIT (options: --continue --kmin-1pass -m  
114 100e+10 --k-list 27,37,47,57,67,77,87 --min-contig-len 1000 -t 16) (41). Contigs were filtered to a minimum  
115 length of 2kb, then indexed and mapped as for single assemblies.

116 METABAT2 (22) was used on both single-sample assemblies and co-assemblies to carry out metagenomic  
117 binning, taking into account coverage values and with the options --minContigLength 2000, --  
118 minContigDepth 2. All bins were dereplicated using dRep (42) with the options dereplicate\_wf -p 16 -comp  
119 80 -con 10 -str 100 -strW. Bins were dereplicated at 99% average nucleotide identity (ANI), resulting in each  
120 MAG being taxonomically equivalent to a microbial strain. Bins were also dereplicated at 95% ANI to  
121 calculate the number of species represented within our MAGs. CompareM was used to calculate average  
122 amino acid identity (AAI) (43).

123 The completeness and contamination of all bins was assessed using CheckM (44) with the options  
124 lineage\_wf, -t 16, -x fa and filtering for completeness  $\geq 80\%$  and contamination  $\leq 10\%$ . GTDB-Tk (45) was  
125 used to assign taxonomy to MAGs, except for CMAG\_333 which upon visual inspection of taxonomic trees  
126 was identified more accurately as *Clostridia*. For submission of our MAGs to NCBI, MAGs were named  
127 based on the following rule: if the lowest taxonomy assigned by GTDB-Tk did not correlate with an NCBI  
128 classification at the correct taxonomic level then MAGs were named after the lowest taxonomic level at  
129 which NCBI and GTDB-Tk matched. Comparative genomics between the MAGs and public datasets was  
130 carried out using MAGpy (46). The taxonomic tree produced by MAGpy was re-rooted manually using  
131 Figtree (47) at the branch between Firmicutes and the other bacterial phyla, and subsequently visualised  
132 using Graphlan (48). The novelty of genomes in comparison to those present in public databases was also  
133 determined. Genomes were defined as novel strains if the ANI output by GTDB-Tk was  $< 99\%$ . Genomes  
134 were determined as novel species if the ANI output by GTDB-Tk was  $< 95\%$  or if an ANI was not output by  
135 GTDB-Tk then the average protein similarity output by MAGpy was  $< 95\%$ . Genera were defined as novel if  
136 all MAGs which clustered at 60% AAI (49) were not assigned a genus by GTDB-Tk. Proposed names for new  
137 genera and species belonging to these genera were formulated based on the International Code of  
138 Nomenclature of Prokaryotes (50). To assess the abundance of our MAGs in other chicken populations,  
139 reads from Munk *et al.* (35) were downloaded from the European Nucleotide Archive (accession number:  
140 PRJEB22062), trimmed using cutadapt (51), aligned to the MAG database using BWA MEM and processed  
141 using Samtools.

142 Carbohydrate active enzymes (CAZymes) were identified by comparing MAG proteins to the CAZy database  
143 (52) using dbcan2 (version 7, 24<sup>th</sup> August 2018). The abundance of CAZyme groups was then calculated as  
144 the sum of reads mapping to MAG proteins within each group after using DIAMOND (53) to align reads to  
145 the MAG proteins.

146

## 147 **Statistics and graphs**

148 Univariate general linear models (GLMs) were performed in SPSS Statistics 21 (IBM) with gender, line and  
149 diet as fixed factors. All other statistical analyses were carried out in R (54) (version 3.5.1.). NMDS graphs  
150 were constructed using the Vegan package (55) and ggplot2 (56), using the Bray–Curtis dissimilarity.  
151 Boxplots were constructed using the ggplot2 package. UpSet graphs were constructed using the UpSetR  
152 package (57). Correlation coefficients, using R's hclust function, were used to cluster samples and MAGs  
153 within heatmaps. PERMANOVA analyses were performed using the Adonis function from the Vegan  
154 package. The package DESeq2 (58) was used to calculate differences in abundance for individual MAGs,  
155 taxonomies and CAZymes. For MAGs, subsampling to the lowest sample coverage was performed prior to  
156 analysis by PERMANOVA and NMDS and before calculating the 1X and 10X coverage of MAGs in samples.

157

158 **Data availability**

159 Paired-read fastq files have been submitted to the European Nucleotide Archive under project PRJEB33338.

160 MAG fasta files have been submitted to Edinburgh DataShare (<https://doi.org/10.7488/ds/2584>).

## 161 Results

### 162 Assembly of 469 draft microbial genomes from chicken caeca

163 We produced 1.6T of Illumina data from 24 chicken samples, carried out a metagenomic assembly of single  
164 samples and also a co-assembly of all samples. 4524 metagenomic bins were created from the single-  
165 sample binning and 576 more were created from co-assembly binning. We were left with a total of 469  
166 dereplicated genomes (99% ANI) with estimated completeness of  $\geq 80\%$  and estimated contamination  $\leq 10\%$   
167 (**Supplementary figure 1**), 377 of which originated from the single-sample binning and 92 from the co-  
168 assembly. Of these, 349 had completeness  $> 90\%$  and contamination  $< 5\%$  (high-quality draft genomes as  
169 defined by Bower *et al.* (59)), 210 were  $> 95\%$  complete with  $< 5\%$  contamination and 47 MAGs were  $> 97\%$   
170 complete with 0% contamination. The distribution of these MAGs (based on coverage) between the 24  
171 samples can be found in **Dataset 1**. After dereplication to 95% ANI, 335 MAGs remained, representing  
172 species identified in our samples. Our dataset therefore contains 469 microbial strains from 335 species.  
173 283 of these species and 460 of these strains were novel when compared to public databases (**Dataset 2**).

174 **Dataset 2** contains the NCBI taxonomic assignment for each MAG along with the assembly characteristics  
175 and GTDB-Tk taxonomic assignments. **Dataset 3** contains comparative genomics information produced by  
176 MAGpy. **Figure 1** shows a phylogenetic tree of the MAGs. This was used to manually correct any errors in  
177 taxonomic identification. By far the most dominant phylum was *Firmicutes\_A* (n=399), followed by  
178 *Firmicutes* (n=51), *Actinobacteriota* (n=10), *Proteobacteria* (n=3: all *Escherichia coli*), *Verrucomicrobiota*  
179 (n=2: genera *UBA11493* and *CAG-312*), *Bacteroidota* (n=1: *Alistipes sp. CHKCI003*), *Campylobacterota* (n=1:  
180 *Helicobacter\_D pullorum*), *Cyanobacteriota* (n=1: order *Gastranaerophilales*) and *Desulfobacterota* (n=1:  
181 genus *Mailhella*). All members of *Firmicutes\_A* belonged to the class *Clostridia*, which included the orders  
182 *Oscillospirales* (n=179), *Lachnospirales* (n=134), *4C28d-15* (n=42), *Christensenellales* (n=17), *TANB77* (n=10),  
183 *Peptostreptococcales* (n=9), *CAG-41* (n=5), *Clostridiales* (n=1), *UBA1212* (n=1) and one MAG which was  
184 undefined at order level (CMAG\_333). All members of *Firmicutes* belonged to the class *Bacilli*; this included  
185 the orders *Lactobacillales* (n=21), *RF39* (n=20), *Erysipelotrichales* (n=8), *Exiguobacterales* (n=1) and *RFN20*  
186 (n=1). The *Actinobacteriota* were divided into two classes, *Actinobacteria* (n=5) and *Coriobacteriia* (n=5:  
187 containing only the order *Coriobacteriales*). The *Actinobacteria* class contained two orders: *Actinomycetales*  
188 (n=4) and *Corynebacteriales* (n=1). 97 MAGs were identified to species, 246 identified to genus, 115  
189 identified to family, 10 identified to order and 1 identified to class. No MAGs were identified as Archaea.

190 **Figure 1:**

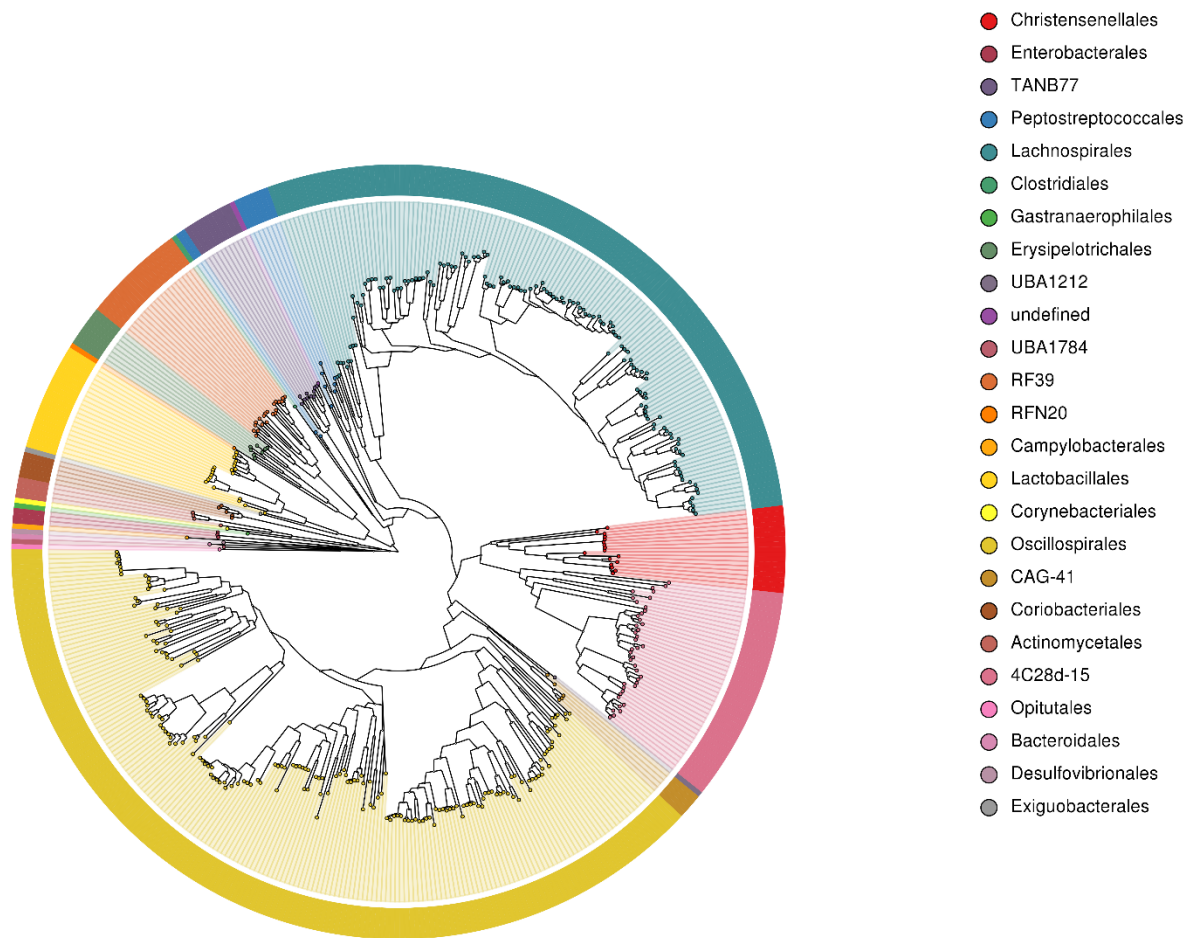

191

192 **Phylogenetic tree of the 469 draft microbial genomes from the chicken caeca, labelled by taxonomic**  
193 **order, as defined by GTDB-Tk. Draft genomes labelled as “undefined” were only able to be assigned**  
194 **taxonomy at a higher level than order.**

195

196 Of the MAGs that show greater than 95% ANI with an existing sequenced genome, several of these  
197 genomes have previously been identified in chickens. Our MAGs include 6 novel strains of  
198 *Anaeromassilibacillus sp. An250* (20), a novel strain of *Anaerotignum lactatifermentans* (60), a novel strain  
199 of *Blautia sp. An81* (20), 3 novel strains of *Drancourtella sp. An57* (20), a novel strain of *Enterococcus*  
200 *cecorum* (61), 2 novel strains of *E.coli* (14, 62, 63), 3 novel strains of *Eubacteriaceae bacterium CHKCI004*  
201 (64), a novel strain of *Eubacterium sp. An11* (20), two novel strains of *Faecalibacterium spp.* (20, 32), 7  
202 novel strains of *Flavonifactor spp.* (20), 3 novel strains of *Gordonibacter spp.* (20), 1 novel strain of  
203 *Helicobacter pullorum* (65), 15 novel strains of *Lachnoclostridium spp.* (20), 6 novel strains of  
204 *Lachnospiraceae bacterium UBA1818* (32), 2 novel strains of *Massiliomicrobiota sp. An134* (20) and 5 novel  
205 strains of *Pseudoflavonifractor sp. An184* (20).



206 We also identified several Lactobacilli which have previously been isolated from the chicken  
207 gastrointestinal tract and have been suggested as potential probiotics in chickens, including 5 novel strains  
208 of *Lactobacillus crispatus* (66-68), 2 novel strains of *Lactobacillus gallinarum* (69), a novel strain of  
209 *Lactobacillus johnsonii* (70, 71), a novel strain of *Lactobacillus oris* (72), a novel strain of *Lactobacillus*  
210 *reuteri* (63, 66, 73) and a novel strain of *Lactobacillus salivarius* (63, 71, 74).

211 Our MAGs represent several putative novel species from 7 taxonomic classes: including 25 species of *Bacilli*,  
212 252 species of *Clostridia*, 2 species of *Coriobacteriia*, 1 species of *Desulfovibrionia*, 1 species of  
213 *Lentisphaeria*, 1 species of *Vampirovibrionia* and 1 species of *Verrucomicrobiae*. These include 5 novel  
214 species of *Lactobacillus*. Our MAGs also contain 42 putative novel genera which contain 69 of our MAGs.  
215 We defined a genus as novel if all MAGs which clustered at 60% AAI were not assigned a genus by GTDB-Tk  
216 (**Dataset 4**). 40 of these novel genera belong to the class *Clostridia*, with over half belonging to the order  
217 *Oscillospirales*. One of the remaining novel genera contains one MAG which belongs to the *Bacilli* class  
218 (order *Exiguobacterales*) while the remaining genus belongs to the *Cyanobacteriota* (*Melainibacteria*),  
219 within the order *Gastranaerophilales*. Our proposed names for these genera and the species they contain  
220 can also be found in **Dataset 4**, alongside descriptions of their derivations. GTDB-Tk was unable to assign  
221 taxonomy to either of these genera at lower than order level, indicating that they may belong to novel  
222 bacterial families. It should also be noted that several genus-level MAG clusters do not contain any MAGs  
223 which were assigned a valid NCBI genus label but instead only received names defined by GTDB-Tk. For  
224 example, Group 16 (**Dataset 4**) is entirely constituted by MAGs of the genus *UBA7102*.

## 225

### 226 **Newly constructed MAGs are abundant in chicken populations across Europe**

227 In order to assess the abundance of our MAGs in other chicken populations, we compared sequence reads  
228 generated from 179 chicken faecal, pooled, herd-level samples, collected from eight different countries  
229 across the European Union (35), to the 469 MAGs generated as part of this study. The read mapping rates  
230 can be seen in **figure 2**. Over 50% of the reads mapped to the MAGs in all samples; in seven out of eight  
231 countries the average read mapping rate was above 70%; and in Italy the average read mapping rate was  
232 above 60%.

233 **Figure 2:**

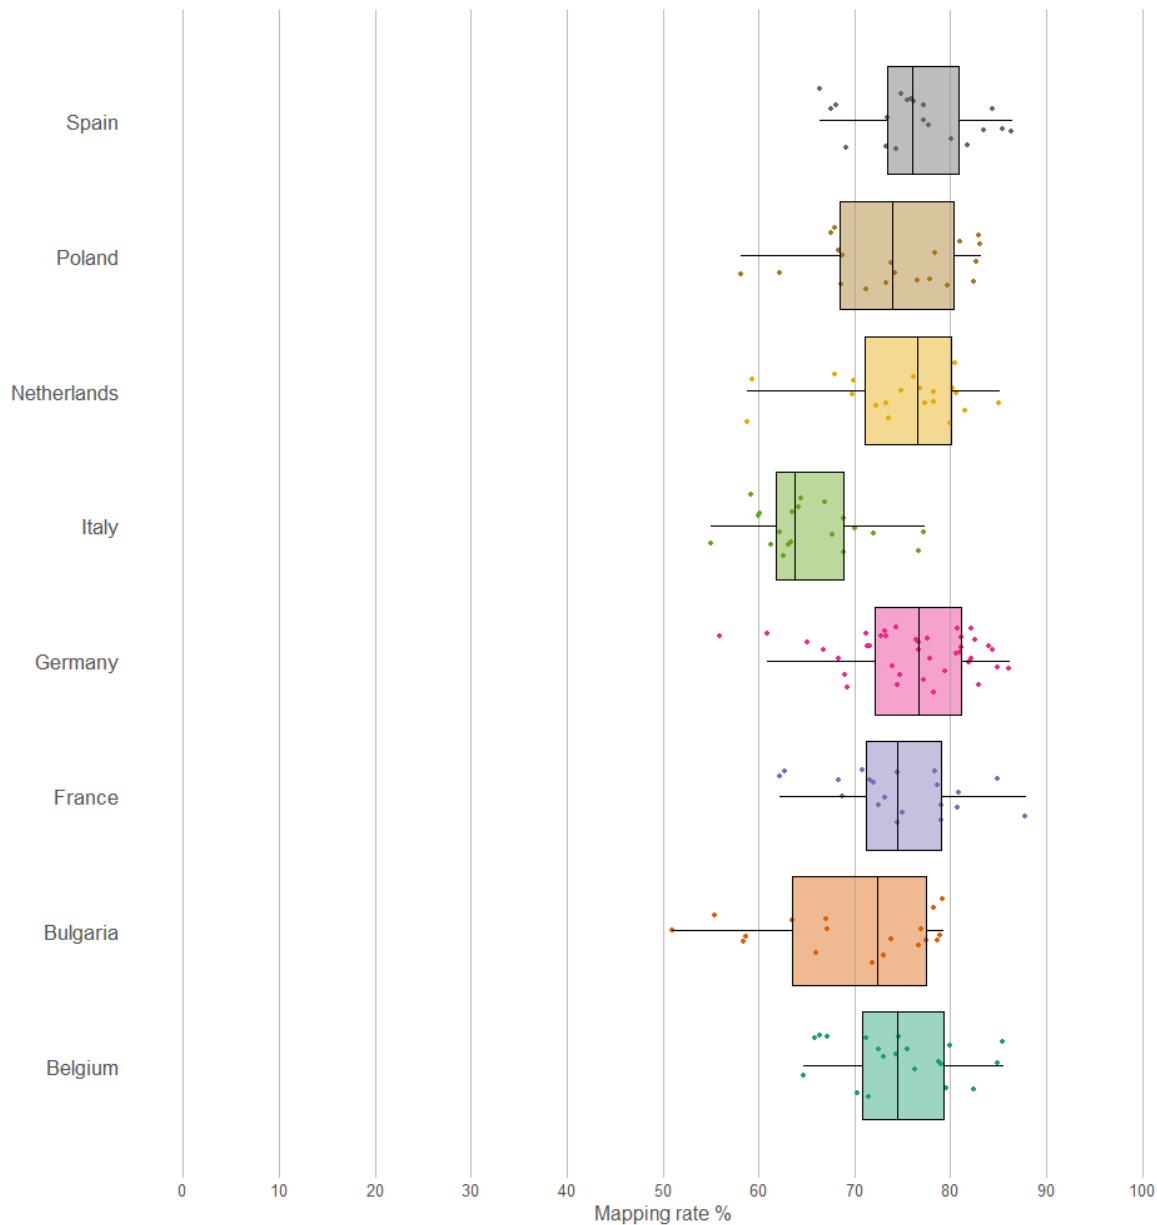

234

235 **Read mapping rates of 179 chicken faecal samples, from 8 EU countries, against a database of the 469**

236 **MAGs**

237 This demonstrates that our MAGs are representative of the chicken gut microbiome in populations

238 throughout the EU, and account for the majority of reads in all cases. The abundance of the MAGs across

239 the 179 samples can be seen in **figure 3**. Whilst there is clear structure in the data, samples do not appear

240 to cluster by country, and the observed similarities may be explained by other factors not available, such as

241 breed, age, or diet.

242 **Figure 3:**

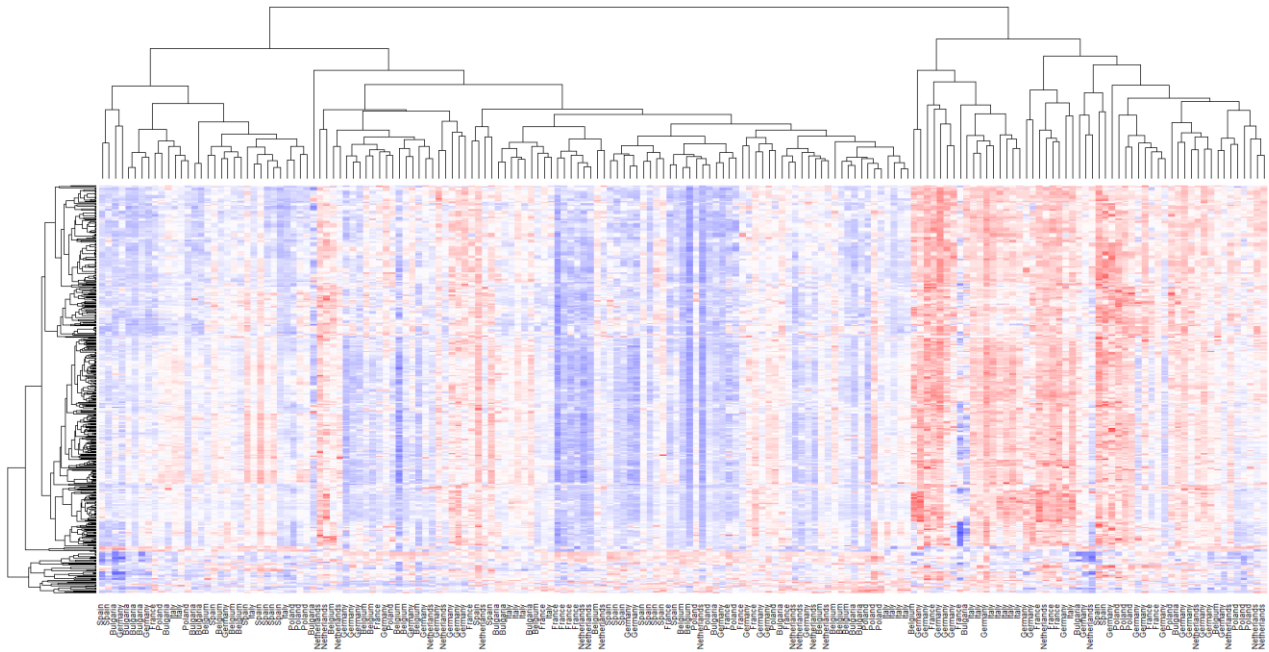

243

244 **Abundance of 469 MAGs in 179 pooled chicken faecal samples from eight countries in the EU. Blue is low**  
245 **abundance, white medium, and red high abundance. Data are scaled within row.**

246

247 **Presence of a core chicken caecal microbiota**

248 125 MAGs were found to be present in at least 1X coverage in all of our samples and 4 of these MAGs were  
249 found to be  $\geq 10$  in all of our samples: *Alistipes* sp. *CHKC1003* CMAG\_6, uncultured *Bifidobacterium* sp.  
250 CMAG\_55, uncultured *Bifidobacterium* sp. CMAG\_59 and *Firmicutes bacterium* CAG\_94 CMAG\_438. Only  
251 one MAG was found to be uniquely present in only one sample at  $\geq 10$  coverage: uncultured *Clostridia* sp.  
252 CMAG\_391 in Chicken 16 (Ross 308: Vegetable diet). The distribution of MAGs between groups can be seen  
253 in **Figure 4**. 276 MAGs were on average present at at least 1X coverage in all groups and could therefore be  
254 described as a core microbiota shared amongst the chickens in our study.

255 **Figure 4:**

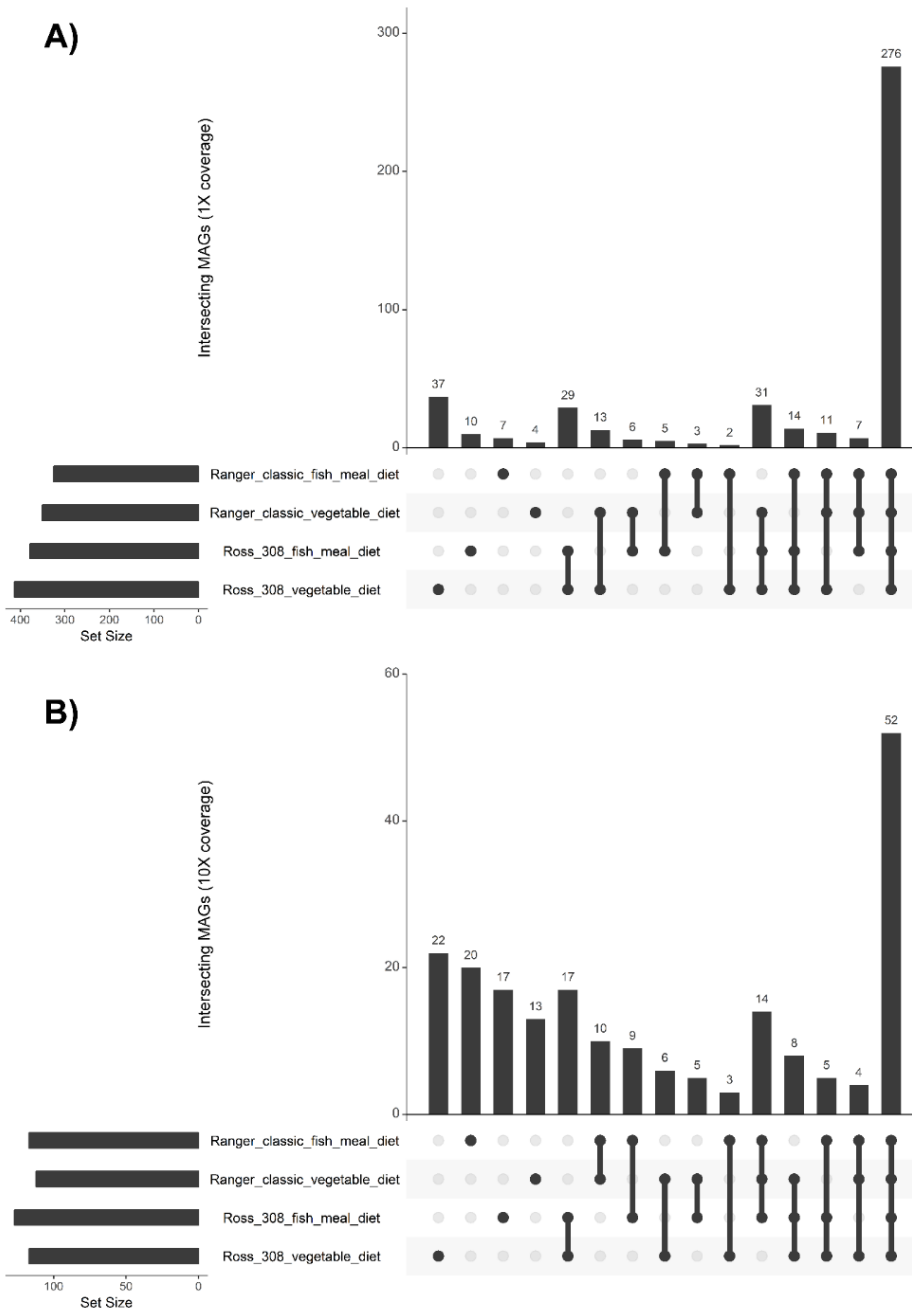

256

257 **UpSet graphs showing the number of shared MAGs at A) average 1X coverage and B) average 10X**  
 258 **coverage in the four chicken groups**

259

260 **Differences in caecal MAGs based on chicken line and diet.**

261 When comparing samples based on the coverage of MAGs, significant clustering of samples by group can  
 262 be observed when comparing all groups (PERMANOVA:  $P < 0.001$ ); between chicken lines (All samples:  
 263 PERMANOVA:  $P < 0.001$ ; Within vegetable diet: PERMANOVA:  $P = 0.015$ , Within fish meal diet  
 264 PERMANOVA:  $P = 0.0082$ )(**Figure 5**) and between diets (All samples: PERMANOVA:  $P = 0.008$ ; Within Ross

265 308 line: PERMANOVA:  $P = 0.018$ ; Within Ranger Classic line: PERMANOVA:  $P = 0.0043$ ) (**Figure 5**). A  
266 significant interaction was also observed between line and diet (Line\*Diet PERMANOVA:  $P = 0.038$ ). Gender  
267 and DNA extraction batch were not found to have significantly affected the abundance of MAGs  
268 (PERMANOVA:  $P > 0.05$ ).

269

270 **Figure 5:**

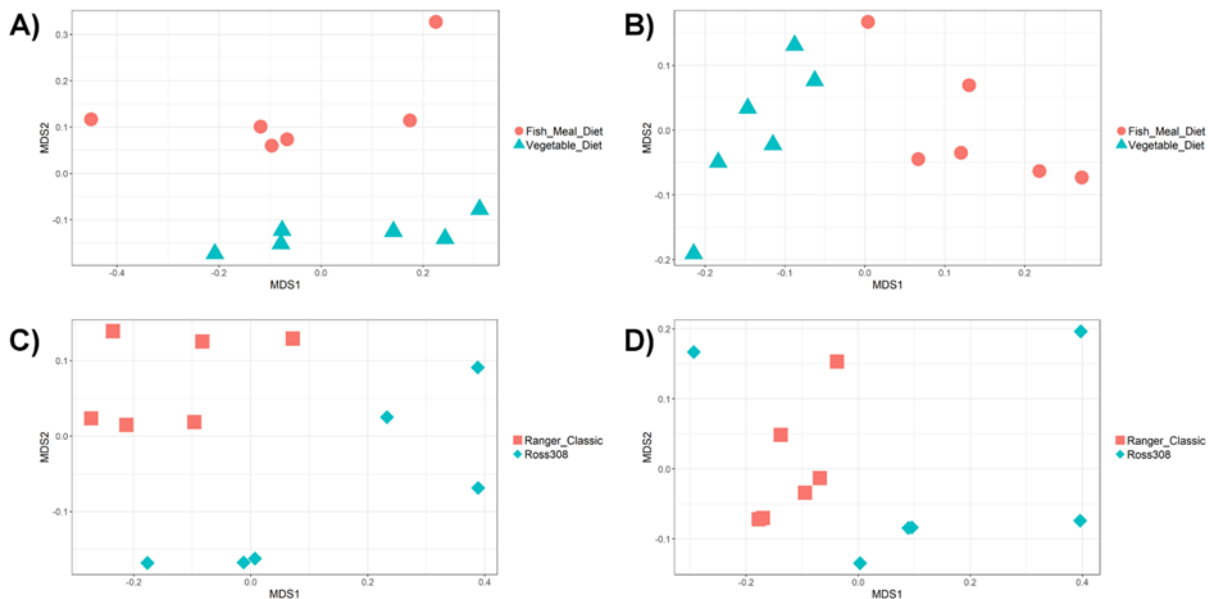

271

272 **NMDS of chicken caecal samples clustered by proportion of MAGs (Bray-Curtis dissimilarity). A) Ross 308**  
273 **birds clustered by diet (PERMANOVA:  $P = 0.018$ ) B) Ranger Classic birds clustered by diet (PERMANOVA:  $P$**   
274 **= 0.0043) C) Birds on a vegetable diet clustered by line (PERMANOVA:  $P = 0.015$ ) D) Birds on a fish meal**  
275 **diet clustered by line (PERMANOVA:  $P = 0.0082$ ).**

276

277 MAGs which were significantly more abundant by coverage between groups were identified by DESeq2  
278 (**Figure 6**); a full list of these MAGs can be found in **Dataset 5**. In Ross 308 birds, 43 MAGs were found to be  
279 differentially abundant between the two diets, while in Ranger Classic birds 45 MAGs were found to be  
280 differentially abundant. Several MAGs were found to be differentially abundant between the two lines  
281 when birds were consuming a vegetable diet (61 MAGs) or a fish meal diet (69 MAGs). 98 MAGs were  
282 found to be differentially abundant between lines when controlling for diet and 64 MAGs were found to be  
283 differentially abundant between diets when controlling for line.

284 **Figure 6:**

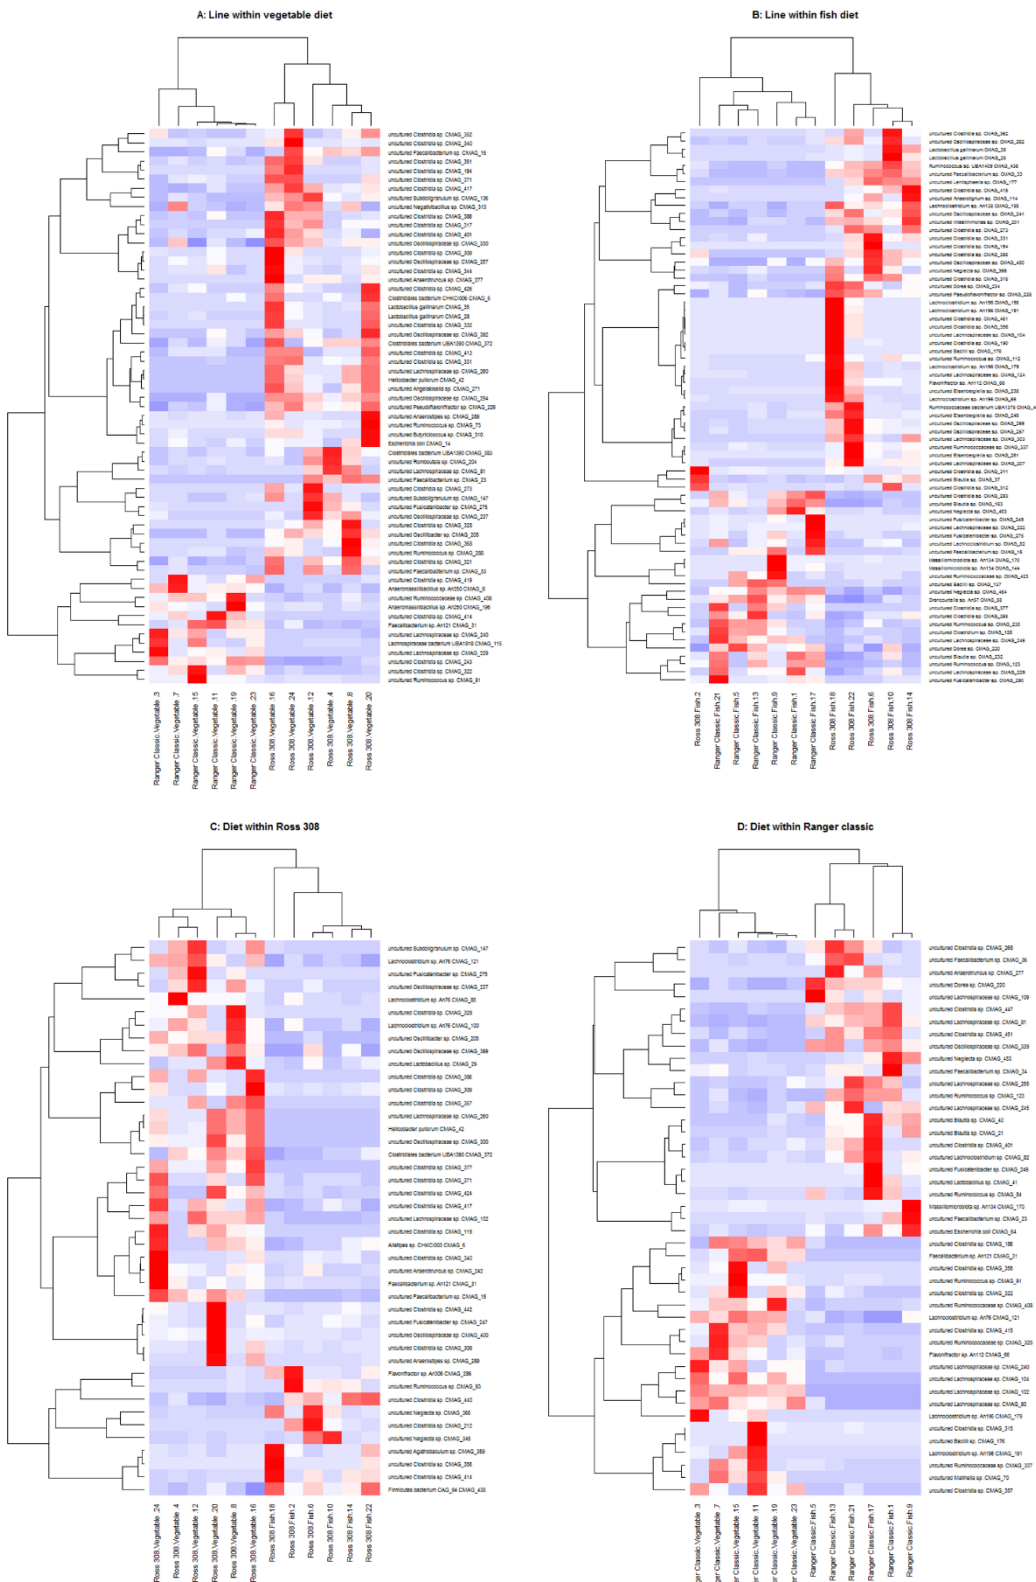

285

286 **Heatmap showing the proportional coverage of MAGs which were significantly differently abundant**

287 **between groups (Deseq2,  $P \leq 0.05$ ). Euclidean clustering was used to cluster MAGs and samples.**

288

289 No MAGs were found to be significantly more abundant in both Ross 308 and Ranger Classic birds fed a fish  
290 meal diet, whilst four MAGs were found to be significantly more abundant in both Ross 308 and Ranger  
291 Classic birds fed a solely vegetable diet: uncultured *Lachnospiraceae* sp. CMAG\_102, *Lachnoclostridium* sp.  
292 *An76* CMAG\_121, *Faecalibacterium* sp. *An121* CMAG\_31 and uncultured *Clostridia* sp. CMAG\_357.

293 Eight MAGs were found to be significantly more abundant in Ross 308 chickens on both diets: uncultured  
294 *Pseudoflavonifractor* sp. CMAG\_226, uncultured *Oscillospiraceae* sp. CMAG\_257, uncultured *Clostridia* sp.  
295 CMAG\_273 and uncultured *Clostridia* sp. CMAG\_331, *Clostridia* sp. CMAG\_194, *Lactobacillus gallinarum*  
296 CMAG\_28, uncultured *Faecalibacterium* sp. CMAG\_33 and *Lactobacillus gallinarum* CMAG\_35. In contrast,  
297 only one MAG was found to be consistently more abundant in Ranger Classic birds on both diets  
298 (uncultured *Lachnospiraceae* sp. CMAG\_229).

299 Lactobacilli are of particular interest to probiotic manufacturers. We found that both MAGs identified as  
300 *L.gallinarum* were more abundant in Ross 308 birds when controlling for diet, and four of the five MAGs  
301 identified as *L.crispatus* were more abundant in birds fed a diet with fish meal when controlling for chicken  
302 line.

303 One notable observation is the high amount of *Helicobacter pullorum* observed in the Ross 308: Vegetable  
304 diet group. While *H. pullorum* is often thought of as a pathogen, it has previously been isolated from the  
305 caeca of asymptomatic chickens (65) and carriage of *Helicobacter* by chickens is common in commercial  
306 flocks (75-77).

307

### 308 **Differences in CAZymes between lines and diets**

309 Carbohydrate-active enzymes (CAZymes) are enzymes involved in the metabolism, synthesis and binding of  
310 carbohydrates. They are grouped by the CAZy database (52) into the following major groups: the auxiliary  
311 activities (AAs) class, carbohydrate-binding modules (CBMs), carbohydrate esterases (CEs), glycoside  
312 hydrolases (GHs), glycosyltransferases (GTs) and polysaccharide lyases (PLs). As their names suggest, CEs  
313 are responsible for the hydrolysis of carbohydrate esters while CBMs are responsible for binding  
314 carbohydrates. GHs and PLs are both responsible for cleaving glycosidic bonds, hydrolytically or non-  
315 hydrolytically respectively, while GTs are able to catalyse the formation of glycosidic bonds. The AA class  
316 are not themselves CAZymes but instead act in conjunction with them as redox enzymes. We compared the  
317 predicted proteins from our MAGs with the CAZy database using dbcan with the cut-offs E-value < 1e-18  
318 and coverage > 0.35.

319 When clustering groups by the abundance of MAG derived CAZymes, all groups separate visually (**Figure 7**)  
320 but only the following differences were significant: Ross 308 birds were shown to cluster significantly by  
321 diet (PERMANOVA, P=0.021), and birds receiving a fish meal diet clustered significantly by line

322 (PERMANOVA,  $P=0.0065$ ). A significant interaction was observed between line and diet (Line\*Diet  
323 PERMANOVA:  $P = 0.0051$ ). Using DESeq2 we also found that the abundances of specific CAZymes differed  
324 between groups (**Figure 8**), full lists of which can be found in **Dataset 6**. We found several starch degrading  
325 enzymes to be differentially abundant between lines when controlling for diet, including GH13 subfamily  
326 10, GH15, GH57, GH4 and GH31, and between diets when controlling for line, including GH13, GH13  
327 subfamily 28 and GH13 subfamily 33. We also found that several CAZymes involved in metabolising  
328 cellulose and hemi-cellulose were differentially abundant between lines when controlling for diet, including  
329 GH5 (subfamilies 19, 37, 48, 44, 18), CE6, GH43 (subfamilies 30, 19, 29, 12), GH115, CE2 and GH67, and  
330 between diets when controlling for line, including GH5 (subfamilies 7 and 48) and GH43 (subfamilies 33, 4  
331 and 35). Gender and DNA extraction batch were not found to have significantly affected the abundance of  
332 CAZymes (PERMANOVA:  $P>0.05$ ).

333

334 **Figure 7:**

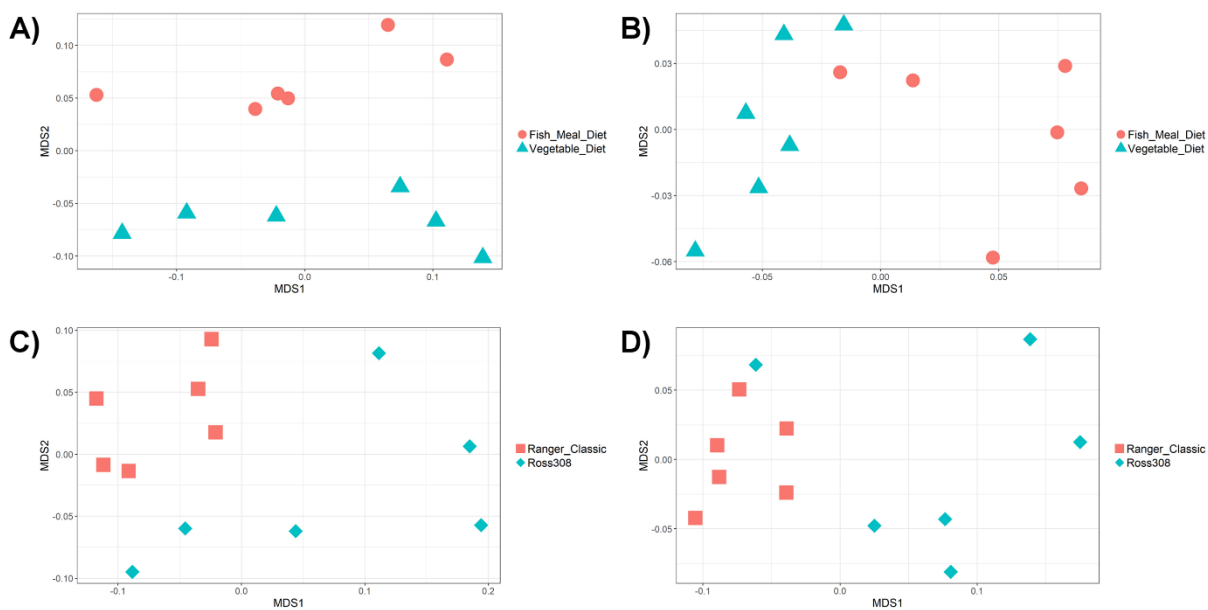

335

336 **NMDS of chicken caecal samples clustered by abundance of MAG CAZymes (Bray-Curtis dissimilarity). A)**  
337 **Ross 308 birds clustered significantly by diet (PERMANOVA:  $P = 0.021$ ) B) Ranger Classic birds did not**  
338 **cluster significantly by diet (PERMANOVA:  $P = 0.095$ ) C) Birds on a vegetable diet did not cluster**  
339 **significantly by line (PERMANOVA:  $P = 0.061$ ) D) Birds on a fish meal diet clustered significantly by line**  
340 **(PERMANOVA:  $P = 0.0065$ ).**



341 **Figure 8:**

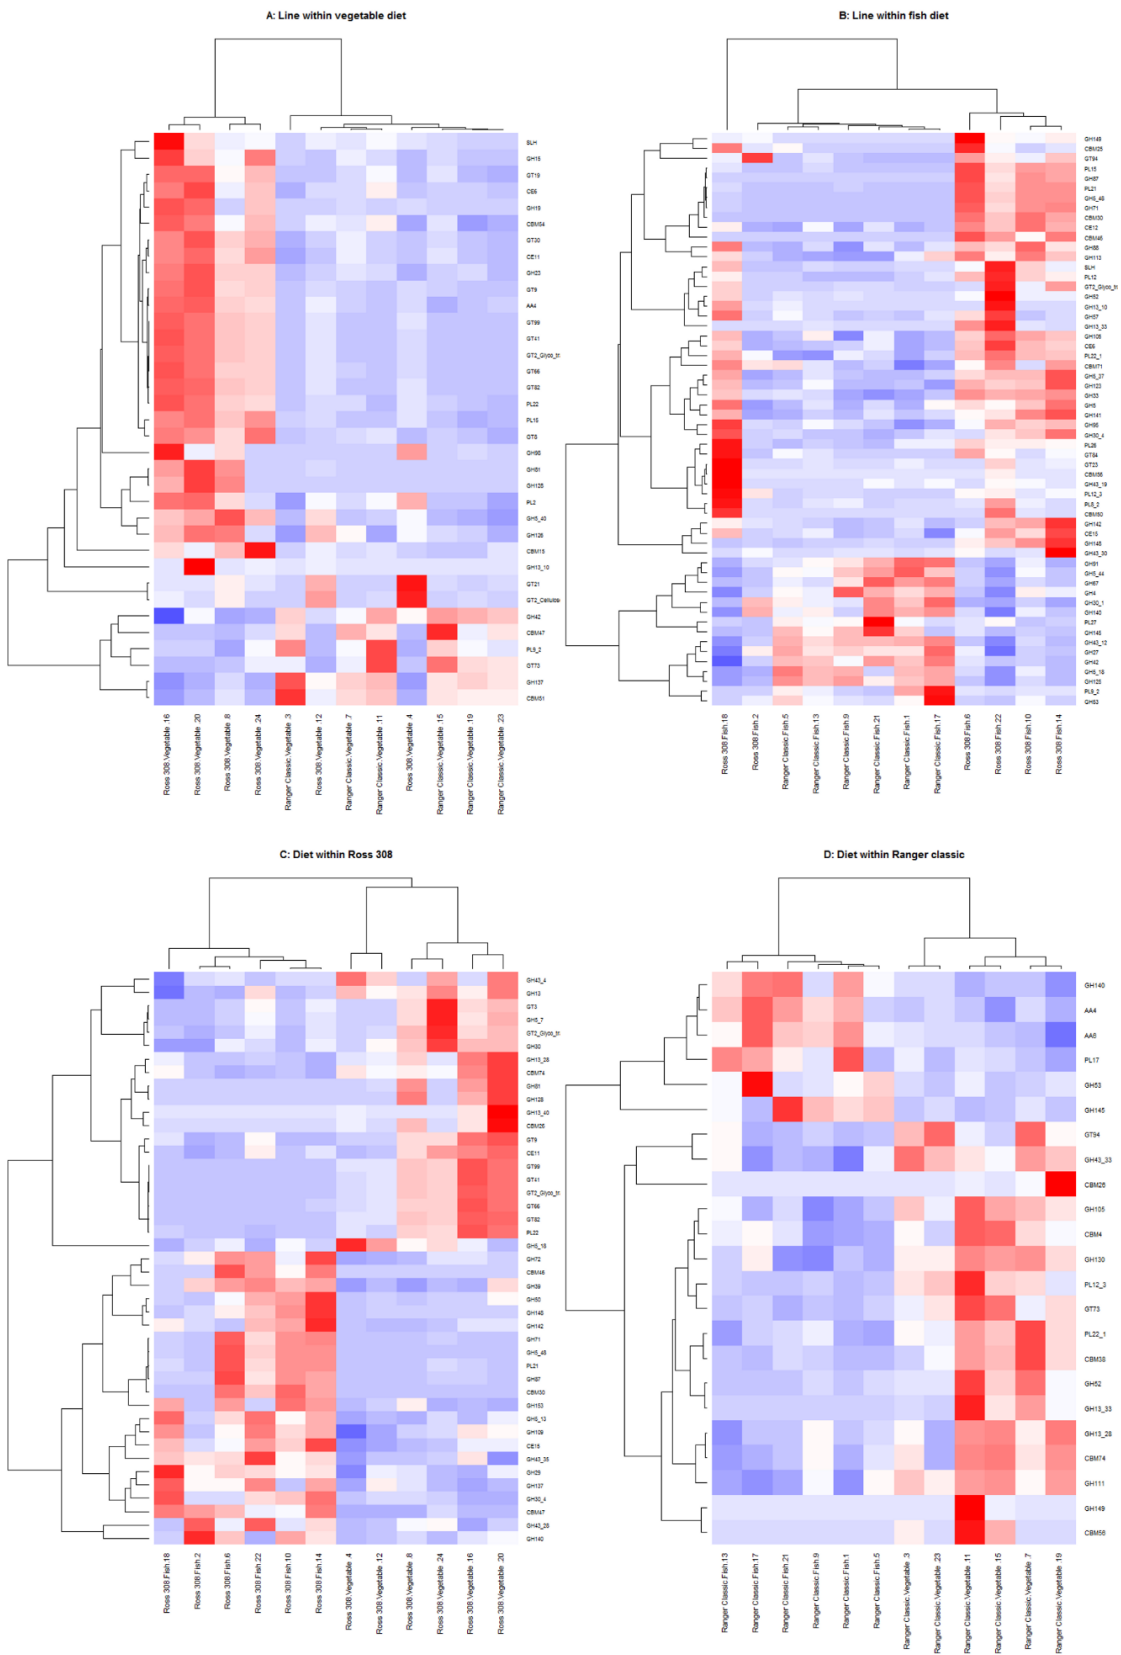

342

343 **Heatmap showing the proportional coverage of MAGs which were significantly differently abundant**  
344 **between groups (Deseq2,  $P \leq 0.05$ ). Euclidean clustering was used to cluster MAGs and samples.**

345

## 346 **Line and gender impact the weight of the chicken**

347 As we did not monitor individual feed intake, we cannot comment on the feed-conversion ratio of these  
348 birds; however, when housed and fed as a group, there are clear statistical differences between the birds in  
349 terms of weight (**Supplementary figure 2**). Univariate GLMs with fixed factors of gender, line and diet were  
350 performed, with bird weight as the dependent variable. Both gender ( $P < 0.001$ ) and line ( $P < 0.001$ ) were  
351 found to significantly impact weight, as expected. Diet was not found to significantly affect bird weight  
352 overall ( $P = 0.220$ ). We did observe a significant increase in bird weight in Ranger Classic birds ( $P = 0.007$ ), of  
353 both genders, fed a fish meal diet; which was not observed in the Ross 308 birds ( $P = 0.778$ ).

354

## 355 **Discussion:**

356 It may be possible to increase chicken productivity by the manipulation of the chicken caecal microbiota.  
357 However, before this is possible we need to develop a good understanding of the types of bacteria present  
358 in the chicken and their nutritional function.

359 In this study we constructed 469 metagenome assembled genomes from chicken caecal contents, greatly  
360 expanding upon previous chicken caecal MAGs (25). 349 of our MAGs had completeness  $> 90\%$  and  
361 contamination  $< 5\%$  and can therefore be classed as high-quality draft genomes as defined by Bower *et al.*  
362 (59). Our MAGs include 460 novel strains and 283 novel species, including 5 novel *Lactobacillus* species. 97  
363 MAGs were able to be identified to species level by GTDB-Tk and a further 246 could be identified to genus.  
364 We also identified 42 novel bacterial genera, 40 of which belonged to the class *Clostridia*. The remaining  
365 two genera belonged to the *Bacilli* class and the *Gastranaerophilales* order of *Cyanobacteriota*, and may  
366 also belong to novel taxonomic families. Our method of defining genera is conservative, as genera within  
367 different taxonomies may cluster at higher AAI (49, 78, 79). We used GTDB-Tk instead of NCBI to assign  
368 taxonomies to our MAGs for the following reasons. The vast majority of our MAGs are members of the  
369 *Clostridia*, whose taxonomies are known to fit poorly with genomic data (80). Indeed, when we constructed  
370 a phylogenetic tree of our MAGs using NCBI classifications, we found many discrepancies between the  
371 taxonomic assignments and our tree (data not shown) resulting in the need for many manual corrections.  
372 However, using GTDB-Tk it was only necessary to manually correct one of our MAGs (CMAG\_333) which  
373 was originally classified as a member of the Dehalobacteriia but clearly sat within the Clostridia in our tree.  
374 Our experiences reflect those of Coil *et al.* who found that the use of GTDB-Tk required less labour and  
375 reduced the need for subjective decisions in taxonomic assignment (81). The majority of our MAGs  
376 belonged to the orders *Oscillospirales* and *Lachnospirales*, members of the *Clostridia* class. The high  
377 abundance of *Clostridia* observed during our study correlates with several previous studies examining the

378 chicken caecal microbiota (20, 82-87). This is likely the product of chicks being raised in an environment  
379 where they are not exposed to a maternal microbiota as feral hens and chicks exposed to an adult hen have  
380 microbiotas which are far less dominated by *Firmicutes* and contain higher abundances of *Bacteroidetes*  
381 (88, 89).

382 Within our dataset we found 276 microbes which were on average present at a minimum 1X coverage in all  
383 four of our groups, potentially indicating a core chicken microbiota. However caution must be taken as all  
384 of our chickens were raised in the same facility and samples were all taken at the same time-point, which  
385 will have limited the variability in microbes present. Chicken microbiota can vary across flocks (90), at  
386 different times in the bird's life (91) and between free-range and intensively-reared chickens (92). To  
387 provide a truly representative dataset of chicken microbial genomes it would be necessary to sequence  
388 caecal samples from birds from multiple lines and raised under a variety of conditions. However, we do  
389 think it is likely that there is a core chicken caecal microbiota which is shared across sites and is irrespective  
390 of management conditions. Our comparison to chicken faeces samples from eight countries which were  
391 part of a pan-EU project on AMR demonstrates that our MAGs are abundant in chicken populations across  
392 Europe, and that these new genomes can account for the majority of reads in chicken gut microbiome  
393 studies. We also identified several novel *Lactobacillus* strains which have previously been posited as  
394 potential chicken probiotics, including *L.crispatus* (66-68), *L.gallinarum* (69), *L.johnsonii* (70, 71), *L.oris* (72),  
395 *L.reuteri* (63, 66, 73) and *L.salivarius* (63, 71, 74).

396 When analysing the abundance of MAGs between birds from different lines, consuming either a vegetable  
397 diet or a diet containing fish meal, we found significant differences in the microbial communities based on  
398 both line and diet. This agrees with previous studies where significant differences have been described in  
399 the intestinal microbiota of chickens from different lines, including those from faster and slower growing  
400 lines (93-95). Differences have also previously been observed in the microbiota when feeding chickens a  
401 diet supplemented with fish meal (33, 34). This correlates with differences observed in the weights of birds  
402 fed the fish meal diet. Ranger Classic birds fed a fish meal diet weighed significantly more than those fed a  
403 vegetable-only diet, whereas there was no significant difference between the weight of the Ross 308 birds  
404 fed on these two diets.

405 Examining those bacteria which were consistently significantly increased in a specific line regardless of diet  
406 or a specific diet regardless of line, the majority of these bacteria are novel species, therefore it is difficult  
407 to hypothesise why they are more abundant in particular bird lines or when birds are fed certain diets. Of  
408 those species that had previously been identified, the two *L.gallinarum* strains were both consistently found  
409 to be more abundant in Ross 308 birds, while *Lachnoclostridium* sp. An76 CMAG\_121 and *Faecalibacterium*  
410 sp. An121 CMAG\_31 were found to be more abundant in birds on the vegetable diet. *L.gallinarum*, is a  
411 homofermentative and thermotolerant (69, 96) species which has previously been suggested as a potential

412 chicken probiotic (67, 97, 98), while *Lachnoclostridium sp. An76* and *Faecalibacterium sp. An121* (20) have  
413 only very recently been discovered and are therefore not well characterised.

414 We are unsure why *H.pullorum* was observed in such high levels in the Ross 308: Vegetable diet group. We  
415 are unable to rule out contamination from the environment as our groups were housed in separate pens  
416 within the same room. We did not observe any negative health effects in this group, and the bacterium is  
417 very common in some flocks (65, 75-77, 99).

418 We wondered whether the differences in microbiota we observed between groups were associated with  
419 changes in the metabolic potential of the caecal microbial communities. Microbes isolated from the chicken  
420 caeca have previously been shown to have highly variable metabolic pathways (100, 101). We found that  
421 the abundances of certain MAG derived CAZymes involved in starch and cellulose degradation were  
422 significantly differently abundant between lines and diets. These molecules are highly abundant in the  
423 predominantly grain based diets fed to chicken. However, energy from starches and celluloses are not  
424 available to the chicken host unless these are first degraded into smaller carbohydrates by the gut  
425 microbiota, therefore differences between the ability of the caecal microbiota to degrade these molecules  
426 may lead to greater efficiency of energy extraction from feed (85).

427 It is also interesting to note that when analysing the abundance of MAG derived CAZymes in the chicken  
428 caeca, we only observed significant separate clustering of birds by diet in the Ross 308 birds and by line in  
429 animals that were consuming the fish meal diet. This indicates that the differences in MAG abundances for  
430 these groups resulted in significantly different pools of metabolic genes. However, significant differences in  
431 MAG abundances were also observed for Ranger Classics on the two diets and for chickens of different lines  
432 consuming the vegetable diet, but this did not result in a significant difference in the total abundance of  
433 CAZymes. This finding serves to highlight that changes in microbiota community composition do not  
434 necessarily lead to significant changes in the total metabolic potential of that community, although it is  
435 possible more significant differences would be observed with a larger sample size. It is worth noting that  
436 while our Ross 308 vegetable diet group contained 4 males and 2 females and the other groups contained 3  
437 males and 3 females, gender was found to have no impact on the abundance of CAZymes or MAGs and this  
438 therefore should not have impacted our results.

439 One outlier was observed in our data: Chicken 2 appeared to cluster separately by the abundance of its  
440 MAGs in comparison to other Ross 308 birds consuming a fish meal diet, supporting the idea that while diet  
441 and line are associated with differences in the microbiota, variation will still exist between birds of the  
442 same line consuming similar diets. It should also be noted that the individual feed intake of each bird was  
443 not measured, meaning that some birds may have consumed different quantities of food, which could lead  
444 to variation in their microbiota compositions.

445 In conclusion, through the construction of metagenome assembled genomes we have greatly increased the  
446 quantity of chicken derived microbial genomes present in public databases and our data can be used as a  
447 reference dataset in future metagenomic studies. While previous studies have demonstrated that *Clostridia*  
448 are very common in the chicken caeca, our study shows that within this class there is a wide diversity of  
449 species present, something which has perhaps been underestimated by culture based studies. To gain a  
450 mechanistic insight into the function of these bacteria and to capture the wide-diversity of bacteria present  
451 in chickens, large-scale culture based studies will be necessary.

452

#### 453 **Acknowledgements:**

454 We would like to thank the staff at the Greenwood Building, Roslin Institute for the care of our animals. We  
455 would also like to thank Prof. Aharon Oren for aiding with the naming of new genera and species, and  
456 Denny Gorman for his help with sample preparations. The Roslin Institute forms part of the Royal (Dick)  
457 School of Veterinary Studies, University of Edinburgh. This project was supported by the Biotechnology and  
458 Biological Sciences Research Council, including institute strategic programme and national capability  
459 awards to The Roslin Institute (BBSRC: BB/P013759/1, BB/P013732/1, BB/J004235/1, BB/J004243/1). MJP is  
460 supported by the Quadram Institute Bioscience BBSRC-funded Strategic Program: Microbes in the Food  
461 Chain (Project No. BB/R012504/1) and its constituent project BBS/E/F/000PR10351 (Theme 3, Microbial  
462 Communities in the Food Chain) and by the Medical Research Council CLIMB grant (MR/L015080/1)

463

#### 464 **References:**

- 465 1. Food Agriculture Organization of the United Nations. FAOSTAT database. FAO Rome, Italy; 2019.
- 466 2. Bennett CE, Thomas R, Williams M, Zalasiewicz J, Edgeworth M, Miller H, et al. The broiler chicken  
467 as a signal of a human reconfigured biosphere. *R Soc Open Sci.* 2018;5(12):11.
- 468 3. Ritchie H, Roser M. Meat and seafood production & consumption 2019 [Available from:  
469 <https://ourworldindata.org/meat-and-seafood-production-consumption>.
- 470 4. OECD/FAO. Meat. OECD-FAO agricultural outlook 2016-2025: OECD Publishing, Paris; 2016.
- 471 5. Prall GFW, van der Steen HAM, Plastow GS. Application of genomics to the pork industry. *J Animal*  
472 *Sci.* 2005;83(suppl\_13):E1-E8.
- 473 6. Gill M, Smith P, Wilkinson JM. Mitigating climate change: The role of domestic livestock. *Animal.*  
474 2010;4(3):323-33.
- 475 7. Kabir SML. The role of probiotics in the poultry industry. *Int J Mol Sci.* 2009;10(8):3531-46.
- 476 8. Clavijo V, Florez MJV. The gastrointestinal microbiome and its association with the control of  
477 pathogens in broiler chicken production: A review. *Poult Sci.* 2018;97(3):1006-21.
- 478 9. Crhanova M, Hradecka H, Faldynova M, Matulova M, Havlickova H, Sisak F, et al. Immune response  
479 of chicken gut to natural colonization by gut microflora and to *Salmonella enterica* Serovar *Enteritidis*  
480 infection. *Infect Immun.* 2011;79(7):2755-63.
- 481 10. Jozefiak D, Rutkowski A, Martin SA. Carbohydrate fermentation in the avian ceca: A review. *Anim*  
482 *Feed Sci Technol.* 2004;113(1-4):1-15.
- 483 11. Karasawa Y. Significant role of the nitrogen recycling system through the ceca occurs in protein-  
484 depleted chickens. *J Exp Zool.* 1999;283(4-5):418-25.

- 485 12. Parsons CM, Potter LM, Brown RD. Effects of dietary carbohydrate and of intestinal microflora on  
486 excretion of endogenous amino-acids by poultry. *Poult Sci.* 1983;62(3):483-9.
- 487 13. Wen C, Yan W, Sun C, Ji C, Zhou Q, Zhang D, et al. The gut microbiota is largely independent of host  
488 genetics in regulating fat deposition in chickens. *Isme J.* 2019;13(6):1422-36.
- 489 14. Mignon-Grasteau S, Narcy A, Rideau N, Chantry-Darmon C, Boscher M-Y, Sellier N, et al. Impact of  
490 selection for digestive efficiency on microbiota composition in the chicken. *PLoS One.*  
491 2015;10(8):e0135488.
- 492 15. Stanley D, Denman SE, Hughes RJ, Geier MS, Crowley TM, Chen HL, et al. Intestinal microbiota  
493 associated with differential feed conversion efficiency in chickens. *Appl Microbiol Biotechnol.*  
494 2012;96(5):1361-9.
- 495 16. Svihus B, Choct M, Classen HL. Function and nutritional roles of the avian caeca: A review. *Worlds*  
496 *Poult Sci J.* 2013;69(2):249-63.
- 497 17. Watson M. Illuminating the future of DNA sequencing. *Genome Biol.* 2014;15(2):2.
- 498 18. Loman NJ, Watson M. Successful test launch for nanopore sequencing. *Nat Methods.*  
499 2015;12(4):303-4.
- 500 19. Shang Y, Kumar S, Oakley B, Kim WK. Chicken gut microbiota: Importance and detection  
501 technology. *Front Vet Sci.* 2018;5:11.
- 502 20. Medvecky M, Cejkova D, Polansky O, Karasova D, Kubasova T, Cizek A, et al. Whole genome  
503 sequencing and function prediction of 133 gut anaerobes isolated from chicken caecum in pure cultures.  
504 *BMC Genomics.* 2018;19(1):561.
- 505 21. Sangwan N, Xia FF, Gilbert JA. Recovering complete and draft population genomes from  
506 metagenome datasets. *Microbiome.* 2016;4:11.
- 507 22. Kang DWD, Froula J, Egan R, Wang Z. MetaBAT, an efficient tool for accurately reconstructing single  
508 genomes from complex microbial communities. *PeerJ.* 2015;3:15.
- 509 23. Pasolli E, Asnicar F, Manara S, Zolfo M, Karcher N, Armanini F, et al. Extensive unexplored human  
510 microbiome diversity revealed by over 150,000 genomes from metagenomes spanning age, geography, and  
511 lifestyle. *Cell.* 2019;176(3):649-62.
- 512 24. Almeida A, Mitchell AL, Boland M, Forster SC, Gloor GB, Tarkowska A, et al. A new genomic  
513 blueprint of the human gut microbiota. *Nature.* 2019;568(7753):499–504.
- 514 25. Sergeant MJ, Constantinidou C, Cogan TA, Bedford MR, Penn CW, Pallen MJ. Extensive microbial  
515 and functional diversity within the chicken cecal microbiome. *PLoS One.* 2014;9(3):13.
- 516 26. Stewart RD, Auffret MD, Warr A, Walker AW, Roehe R, Watson M. The genomic and proteomic  
517 landscape of the rumen microbiome revealed by comprehensive genome-resolved metagenomics. *bioRxiv*  
518 preprint. 2018:489443.
- 519 27. Stewart RD, Auffret MD, Warr A, Wiser AH, Press MO, Langford KW, et al. Assembly of 913  
520 microbial genomes from metagenomic sequencing of the cow rumen. *Nat Commun.* 2018;9:11.
- 521 28. Wang W, Hu H, Zijlstra RT, Zheng J, Gänzle MG. Metagenomic reconstructions of gut microbial  
522 metabolism in weanling pigs. *Microbiome.* 2019;7(1):48.
- 523 29. Iverson V, Morris RM, Frazar CD, Berthiaume CT, Morales RL, Armbrust EV. Untangling genomes  
524 from metagenomes: Revealing an uncultured class of marine euryarchaeota. *Science.* 2012;335(6068):587-  
525 90.
- 526 30. Hugerth LW, Larsson J, Alneberg J, Lindh MV, Legrand C, Pinhassi J, et al. Metagenome-assembled  
527 genomes uncover a global brackish microbiome. *Genome Biol.* 2015;16:18.
- 528 31. Anantharaman K, Brown CT, Hug LA, Sharon I, Castelle CJ, Probst AJ, et al. Thousands of microbial  
529 genomes shed light on interconnected biogeochemical processes in an aquifer system. *Nat Commun.*  
530 2016;7:11.
- 531 32. Parks DH, Rinke C, Chuvochina M, Chaumeil PA, Woodcroft BJ, Evans PN, et al. Recovery of nearly  
532 8,000 metagenome-assembled genomes substantially expands the tree of life. *Nat Microbiol.*  
533 2017;2(11):1533-42.
- 534 33. Wu SB, Stanley D, Rodgers N, Swick RA, Moore RJ. Two necrotic enteritis predisposing factors,  
535 dietary fishmeal and *Eimeria* infection, induce large changes in the caecal microbiota of broiler chickens.  
536 *Vet Microbiol.* 2014;169(3-4):188-97.

- 537 34. Stanley D, Wu SB, Rodgers N, Swick RA, Moore RJ. Differential responses of cecal microbiota to  
538 fishmeal, *Eimeria* and *Clostridium perfringens* in a necrotic enteritis challenge model in chickens. PLoS One.  
539 2014;9(8):10.
- 540 35. Munk P, Knudsen BE, Lukjancenko O, Duarte ASR, Van Gompel L, Luiken REC, et al. Abundance and  
541 diversity of the faecal resistome in slaughter pigs and broilers in nine European countries. Nat Microbiol.  
542 2018;3(8):898-908.
- 543 36. Glendinning L, Wright S, Pollock J, Tennant P, Collie D, McLachlan G. Variability of the sheep lung  
544 microbiota. Appl Environ Microbiol. 2016;82(11):3225-38.
- 545 37. Bolger AM, Lohse M, Usadel B. Trimmomatic: A flexible trimmer for Illumina sequence data.  
546 Bioinformatics. 2014;30(15):2114-20.
- 547 38. Peng Y, Leung HCM, Yiu SM, Chin FYL. IDBA-UD: A de novo assembler for single-cell and  
548 metagenomic sequencing data with highly uneven depth. Bioinformatics. 2012;28(11):1420-8.
- 549 39. Li H. Aligning sequence reads, clone sequences and assembly contigs with BWA-MEM. arXiv  
550 preprint arXiv:13033997. 2013.
- 551 40. Li H, Handsaker B, Wysoker A, Fennell T, Ruan J, Homer N, et al. The Sequence Alignment/Map  
552 format and SAMtools. Bioinformatics. 2009;25(16):2078-9.
- 553 41. Li DH, Liu CM, Luo RB, Sadakane K, Lam TW. MEGAHIT: An ultra-fast single-node solution for large  
554 and complex metagenomics assembly via succinct de Bruijn graph. Bioinformatics. 2015;31(10):1674-6.
- 555 42. Olm MR, Brown CT, Brooks B, Banfield JF. dRep: A tool for fast and accurate genomic comparisons  
556 that enables improved genome recovery from metagenomes through de-replication. Isme J.  
557 2017;11(12):2864-8.
- 558 43. Parks D. CompareM. <https://github.com/dparks1134/CompareM2019>.
- 559 44. Parks DH, Imelfort M, Skennerton CT, Hugenholtz P, Tyson GW. CheckM: Assessing the quality of  
560 microbial genomes recovered from isolates, single cells, and metagenomes. Genome Res. 2015;25(7):1043-  
561 55.
- 562 45. Parks DH, Chuvochina M, Waite DW, Rinke C, Skarszewski A, Chaumeil PA, et al. A standardized  
563 bacterial taxonomy based on genome phylogeny substantially revises the tree of life. Nat Biotechnol.  
564 2018;36(10):996-1004.
- 565 46. Stewart RD, Auffret MD, Snelling TJ, Roehe R, Watson M. MAGpy: A reproducible pipeline for the  
566 downstream analysis of metagenome-assembled genomes (MAGs). Bioinformatics. 2018:bty905.
- 567 47. Rambaut A. FigTree v1. 4. <http://treebioedacuk/software/figtree2012>.
- 568 48. Asnicar F, Weingart G, Tickle TL, Huttenhower C, Segata N. Compact graphical representation of  
569 phylogenetic data and metadata with GraPhlAn. PeerJ. 2015;3:17.
- 570 49. Luo CW, Rodriguez LM, Konstantinidis KT. MyTaxa: An advanced taxonomic classifier for genomic  
571 and metagenomic sequences. Nucleic Acids Res. 2014;42(8):12.
- 572 50. Parker CT, Tindall BJ, Garrity GM. International code of nomenclature of prokaryotes: Prokaryotic  
573 code (2008 revision). Int J Syst Evol Microbiol. 2019;69(1A):S7-S111.
- 574 51. Martin M. Cutadapt removes adapter sequences from high-throughput sequencing reads. EMBnet  
575 J. 2011;17(1):10-2.
- 576 52. Cantarel BL, Coutinho PM, Rancurel C, Bernard T, Lombard V, Henrissat B. The Carbohydrate-Active  
577 EnZymes database (CAZy): An expert resource for glycogenomics. Nucleic Acids Res. 2009;37:D233-D8.
- 578 53. Buchfink B, Xie C, Huson DH. Fast and sensitive protein alignment using DIAMOND. Nat Methods.  
579 2015;12(1):59-60.
- 580 54. Team RC. R: A language and environment for statistical computing. 2013.
- 581 55. Oksanen J, Blanchet FG, Friendly M, Kindt R, Legendre P, McGlenn D, et al. vegan: Community  
582 Ecology Package. R package version 25-2 <https://CRANR-projectorg/package=vegan2013>.
- 583 56. Wickham H. ggplot2: Elegant graphics for data analysis. <http://ggplot2org2016>.
- 584 57. Lex A, Gehlenborg N, Strobel H, Vuilleumot R, Pfister H. UpSet: Visualization of intersecting sets.  
585 IEEE Trans Vis Comput Graph. 2014;20(12):1983-92.
- 586 58. Love MI, Huber W, Anders S. Moderated estimation of fold change and dispersion for RNA-seq data  
587 with DESeq2. Genome Biol. 2014;15(12):38.

- 588 59. Bowers RM, Kyrpides NC, Stepanauskas R, Harmon-Smith M, Doud D, Reddy TBK, et al. Minimum  
589 information about a single amplified genome (MISAG) and a metagenome- assembled genome (MIMAG) of  
590 bacteria and archaea. *Nat Biotechnol.* 2017;35(8):725-31.
- 591 60. van der Wielen P, Rovers G, Scheepens JMA, Biesterveld S. *Clostridium lactatifermentans* sp nov., a  
592 lactate-fermenting anaerobe isolated from the caeca of a chicken. *Int J Syst Evol Microbiol.* 2002;52:921-5.
- 593 61. Boerlin P, Nicholson V, Brash M, Slavic D, Boyen F, Sanei B, et al. Diversity of *Enterococcus cecorum*  
594 from chickens. *Vet Microbiol.* 2012;157(3-4):405-11.
- 595 62. Awad WA, Mann E, Dzieciol M, Hess C, Schmitz-Esser S, Wagner M, et al. Age-related differences in  
596 the luminal and mucosa-associated gut microbiome of broiler chickens and shifts associated with  
597 *Campylobacter jejuni* infection. *Front Cell Infect Microbiol.* 2016;6(154).
- 598 63. Yu H, Si W, Gong J, Forster RJ, Yang C, Huang R, et al. 16S rRNA gene-based analysis of mucosa-  
599 associated bacterial community and phylogeny in the chicken gastrointestinal tracts: From crops to ceca.  
600 *FEMS Microbiol Ecol.* 2007;59(1):147-57.
- 601 64. Duggett NA, Kay GL, Sergeant MJ, Bedford M, Constantinidou CI, Penn CW, et al. Draft genome  
602 sequences of six novel bacterial isolates from chicken ceca. *Genome Announc.* 2016;4(3):e00448-16.
- 603 65. Stanley J, Linton D, Burnens AP, Dewhirst FE, On SLW, Porter A, et al. *Helicobacter pullorum* sp. nov.  
604 - genotype and phenotype of a new species isolated from poultry and from human patients with  
605 gastroenteritis. *Microbiol-UK.* 1994;140:3441-9.
- 606 66. Lu J, Idris U, Harmon B, Hofacre C, Maurer JJ, Lee MD. Diversity and succession of the intestinal  
607 bacterial community of the maturing broiler chicken. *Appl Environ Microbiol* 2003;69(11):6816.
- 608 67. Neal-McKinney JM, Lu X, Duong T, Larson CL, Call DR, Shah DH, et al. Production of organic acids by  
609 probiotic Lactobacilli can be used to reduce pathogen load in poultry. *PLoS One.* 2012;7(9):e43928.
- 610 68. Beasley SS, Takala TM, Reunanen J, Apajalahti J, Saris PEJ. Characterization and  
611 electrotransformation of *Lactobacillus crispatus* isolated from chicken crop and intestine. *Poult Sci.*  
612 2004;83(1):45-8.
- 613 69. Fujisawa T, Benno Y, Yaeshima T, Mitsuoka T. Taxonomic study of the *lactobacillus-acidophilus*  
614 group, with recognition of *lactobacillus-gallinarum* sp-nov and *lactobacillus-johnsonii* sp-nov and synonymy  
615 of *lactobacillus-acidophilus* group-a3 (johnson et-al 1980) with the type strain of *lactobacillus-amylovorus*  
616 (nakamura 1981). *Int J Syst Bacteriol.* 1992;42(3):487-91.
- 617 70. Taheri HR, Moravej H, Tabandeh F, Zaghari M, Shivazad M. Efficacy of combined or single use of  
618 *Lactobacillus crispatus* LT116 and *L. johnsonii* LT171 on broiler performance *Br Poult Sci* 2010;51(5):580-5.
- 619 71. Bjerrum L, Engberg RM, Leser TD, Jensen BB, Finster K, Pedersen K. Microbial community  
620 composition of the ileum and cecum of broiler chickens as revealed by molecular and culture-based  
621 techniques. *Poult Sci* 2006;85(7):1151-64.
- 622 72. Dec M, Nowaczek A, Urban-Chmiel R, Stepien-Pysniak D, Wernicki A. Probiotic potential of  
623 *Lactobacillus* isolates of chicken origin with anti-*Campylobacter* activity. *J Vet Med Sci.* 2018;80(8):1195-  
624 203.
- 625 73. Yu B, Liu JR, Hsiao FS, Chiou PWS. Evaluation of *Lactobacillus reuteri* Pg4 strain expressing  
626 heterologous  $\beta$ -glucanase as a probiotic in poultry diets based on barley. *Anim Nutr Feed Techn.*  
627 2008;141(1):82-91.
- 628 74. Saint-Cyr MJ, Haddad N, Taminiau B, Poezevara T, Quesne S, Amelot M, et al. Use of the potential  
629 probiotic strain *Lactobacillus salivarius* SMXD51 to control *Campylobacter jejuni* in broilers. *Int J Food*  
630 *Microbiol.* 2017;247:9-17.
- 631 75. Zanoni RG, Rossi M, Giacomucci D, Sanguinetti V, Manfreda G. Occurrence and antibiotic  
632 susceptibility of *Helicobacter pullorum* from broiler chickens and commercial laying hens in Italy. *Int J Food*  
633 *Microbiol.* 2007;116(1):168-73.
- 634 76. Ceelen LM, Decostere A, Van den Buick K, On SLW, Baele M, Ducatelle R, et al. *Helicobacter*  
635 *pullorum* in chickens, Belgium. *Emerg Infect Dis.* 2006;12(2):263-7.
- 636 77. Kaakoush NO, Sodhi N, Chenu JW, Cox JM, Riordan SM, Mitchell HM. The interplay between  
637 *Campylobacter* and *Helicobacter* species and other gastrointestinal microbiota of commercial broiler  
638 chickens. *Gut Pathogens.* 2014;6:10.



- 639 78. Orata FD, Meier-Kolthoff JP, Sauvageau D, Stein LY. Phylogenomic analysis of the  
640 Gammaproteobacterial Methanotrophs (order *Methylococcales*) calls for the reclassification of members at  
641 the genus and species levels. *Front Microbiol.* 2018;9:17.
- 642 79. Konstantinidis KT, Tiedje JM. Towards a genome-based taxonomy for prokaryotes. *J Bacteriol.*  
643 2005;187(18):6258-64.
- 644 80. Cruz-Morales P, Orellana CA, Moutafis G, Moonen G, Rincon G, Nielsen LK, et al. Revisiting the  
645 evolution and taxonomy of *Clostridia*, a phylogenomic update. *Genome Biol Evol.* 2019;Epub ahead of  
646 print:evz096.
- 647 81. Coil DA, Jospin G, Darling AE, Wallis C, Davis IJ, Harris S, et al. Genomes from bacteria associated  
648 with the canine oral cavity: A test case for automated genome-based taxonomic assignment. *PLoS One.*  
649 2019;14(6):9.
- 650 82. Ballou AL, Ali RA, Mendoza MA, Ellis JC, Hassan HM, Croom WJ, et al. Development of the chick  
651 microbiome: How early exposure influences future microbial diversity. *Front Vet Sci.* 2016;3:12.
- 652 83. Oakley BB, Buhr RJ, Ritz CW, Kiepper BH, Berrang ME, Seal BS, et al. Successional changes in the  
653 chicken cecal microbiome during 42 days of growth are independent of organic acid feed additives. *BMC*  
654 *Vet Res.* 2014;10:8.
- 655 84. Sekelja M, Rud I, Knutsen SH, Denstadli V, Westereng B, Naes T, et al. Abrupt temporal fluctuations  
656 in the chicken fecal microbiota are explained by its gastrointestinal origin. *Appl Environ Microbiol.*  
657 2012;78(8):2941-8.
- 658 85. Stanley D, Geier MS, Denman SE, Haring VR, Crowley TM, Hughes RJ, et al. Identification of chicken  
659 intestinal microbiota correlated with the efficiency of energy extraction from feed. *Vet Microbiol.*  
660 2013;164(1-2):85-92.
- 661 86. Wei S, Morrison M, Yu Z. Bacterial census of poultry intestinal microbiome. *Poult Sci.*  
662 2013;92(3):671-83.
- 663 87. Hieke ASC, Hubert SM, Athrey G. Circadian disruption and divergent microbiota acquisition under  
664 extended photoperiod regimens in chicken. *PeerJ.* 2019;7:28.
- 665 88. Kubasova T, Kollarikova M, Crhanova M, Karasova D, Cejkova D, Sebkova A, et al. Contact with  
666 adult hen affects development of caecal microbiota in newly hatched chicks. *PLoS One.* 2019;14(3):13.
- 667 89. Ferrario C, Alessandri G, Mancabelli L, Gering E, Mangifesta M, Milani C, et al. Untangling the cecal  
668 microbiota of feral chickens by culturomic and metagenomic analyses. *Environ Microbiol.*  
669 2017;19(11):4771-83.
- 670 90. Stanley D, Geier MS, Hughes RJ, Denman SE, Moore RJ. Highly variable microbiota development in  
671 the chicken gastrointestinal tract. *PLoS One.* 2013;8(12):7.
- 672 91. Videnska P, Sedlar K, Lukac M, Faldynova M, Gerzova L, Cejkova D, et al. Succession and  
673 replacement of bacterial populations in the caecum of egg laying hens over their whole life. *PLoS One.*  
674 2014;9(12):14.
- 675 92. Mancabelli L, Ferrario C, Milani C, Mangifesta M, Turrone F, Duranti S, et al. Insights into the  
676 biodiversity of the gut microbiota of broiler chickens. *Environ Microbiol.* 2016;18(12):4727-38.
- 677 93. Ding JM, Zhao LL, Wang LF, Zhao WJ, Zhai ZX, Leng L, et al. Divergent selection-induced obesity  
678 alters the composition and functional pathways of chicken gut microbiota. *Genet Sel Evol.* 2016;48:9.
- 679 94. Ocejo M, Oporto B, Hurtado A. 16S rRNA amplicon sequencing characterization of caecal  
680 microbiome composition of broilers and free-range slow-growing chickens throughout their productive  
681 lifespan. *Sci Rep.* 2019;9:14.
- 682 95. Pandit RJ, Hinsu AT, Patel NV, Koringa PG, Jakhesara SJ, Thakkar JR, et al. Microbial diversity and  
683 community composition of caecal microbiota in commercial and indigenous Indian chickens determined  
684 using 16s rDNA amplicon sequencing. *Microbiome.* 2018;6:13.
- 685 96. Jebava I, Chuat V, Lortal S, Valence F. Peptidoglycan hydrolases as species-specific markers to  
686 differentiate *Lactobacillus helveticus* from *Lactobacillus gallinarum* and other closely related  
687 homofermentative Lactobacilli. *Curr Microbiol.* 2014;68(4):551-7.
- 688 97. Saminathan M, Sieo CC, Kalavathy R, Abdullah N, Ho YW. Effect of prebiotic oligosaccharides on  
689 growth of *Lactobacillus* strains used as a probiotic for chickens. *Afr J Microbiol Res.* 2011;5(1):57-64.
- 690 98. Askelson TE, Campasino A, Lee JT, Duong T. Evaluation of phytate-degrading *Lactobacillus* culture  
691 administration to broiler chickens. *Appl Environ Microbiol.* 2014;80(3):943-50.

- 692 99. Manfreda G, Parisi A, Lucchi A, Zanoni RG, De Cesare A. Prevalence of *Helicobacter pullorum* in  
693 conventional, organic, and free-range broilers and typing of isolates. *Appl Environ Microbiol.*  
694 2011;77(2):479-84.  
695 100. Eeckhaut V, Van Immerseel F, Croubels S, De Baere S, Haesebrouck F, Ducatelle R, et al. Butyrate  
696 production in phylogenetically diverse *Firmicutes* isolated from the chicken caecum. *Microb Biotechnol.*  
697 2011;4(4):503-12.  
698 101. Polansky O, Sekelova Z, Faldynova M, Sebkova A, Sisak F, Rychlik I. Important metabolic pathways  
699 and biological processes expressed by chicken cecal microbiota. *Appl Environ Microbiol.* 2016;82(5):1569-  
700 76.

701

702

703 **Dataset legends:**

704 **Dataset 1:** Average coverage of MAGs in all samples. Coverage was calculated by mapping MAG scaffolds to  
705 the adaptor trimmed Illumina reads for each sample. The average coverage of the scaffolds from a MAG  
706 within a sample were taken as the average abundance of that MAG in the sample.

707 **Dataset 2:** Description of each chicken MAG (metagenome-assembled genome), including novelty of  
708 species or strain, NCBI\_name, GTDB-Tk\_taxonomy, CheckM completeness and contamination, assembly  
709 size (mb), N50, number of contigs, the longest contig length (bp) and the GC content.

710 **Dataset 3:** Taxonomy assigned by MAGpy to MAGs.

711 **Dataset 4:** Clustering of samples at 60% AAI to form genus clusters. Novel genera were defined as clusters  
712 of MAGs at 60% AAI which were not assigned a genus by GTDB-Tk

713 **Dataset 5:** MAGs which were identified as being significantly more abundant by DESeq2 between diets and  
714 lines.

715 **Dataset 6:** CAZymes which were identified as being significantly more abundant by DESeq2 between diets  
716 and lines.
